# Supplementary material for: Comment on “Atmospheric chemistry of oxazole: the mechanism and kinetic studies on oxidation reaction initiated by OH radicals” by A. Shiroudi, M. A. Abdel-Rahman, A. M. El-Nahas and M. Altarawneh, New J. Chem., 2021, 45, 2237
Source: Royal Society of Chemistry journal article supplement (doi:10.1039/d1nj01020d), 2021-01-01
Supplement: d1nj01020d1.pdf [file d1nj01020d1.pdf]

*Supplementary Information for*

**Comment on "Atmospheric chemistry of oxazole: the mechanism and kinetic studies on oxidation reaction initiated by OH radicals" by A. Shiroudi, M. A. Abdel-Rahman, A. M. El-Nahas and M. Altarawneh, New Journal of Chemistry, 2021, 45, 2237**

Tam V.-T. Mai<sup>a</sup> and Lam K. Huynh<sup>b\*</sup>

<sup>a</sup> University of Science, Ho Chi Minh City, 227 Nguyen Van Cu, Ward 4, District 5, Ho Chi Minh City, Vietnam.

<sup>b</sup> International University, International University, Block 6, Linh Trung Ward, Thu Duc City, Ho Chi Minh City, Vietnam.

## Contents

|                                                                                                                                                                                                                                                                                                                                                                                                                   |    |
|-------------------------------------------------------------------------------------------------------------------------------------------------------------------------------------------------------------------------------------------------------------------------------------------------------------------------------------------------------------------------------------------------------------------|----|
| <b>Table S1:</b> Optimized geometries, electronic energies at 0 K ( $E_{elec}^{0K}$ ), zero-point energy (ZPE) corrections and harmonic wavenumbers of the species involved with the lowest-energy conformer of a given species, calculated at the M06-2X/aug-cc-pVTZ level of theory for the title reaction. See Figure 1 (in the main text) for the notations. ....                                             | 3  |
| <b>Table S2:</b> Calculated overall rate constants, $k_{tot}$ , of the oxazole + OH $\rightarrow$ products over the range of temperature 299 – 468 K at different pressures, including the HIR treatments, Eckart quantum tunneling effects. Units are in cm <sup>3</sup> /molecule/s.....                                                                                                                        | 8  |
| <b>Table S3:</b> Comparison of the zero-point energy corrected relative energies (in kcal·mol <sup>-1</sup> ) of all species involved in the title reaction calculated at the same methods, M06-2X/aug-cc-pVTZ and ROCBS-QB3//M06-2X/aug-cc-pVTZ, by this work and Shiroudi <i>et al.</i> <sup>3</sup> (0 K). The numbers are relative to the energies of oxazole + OH. See Fig. 1 for the species notations..... | 9  |
| <b>Table S4:</b> Calculated overall rate constants, $k_{tot}$ , of the oxazole + OH $\rightarrow$ products over the range of temperature 299 – 468 K at $P = 100$ Torr with and without HIR treatments based on M06-2X/aug-cc-pVTZ level of theory. Units are in cm <sup>3</sup> /molecule/s. ....                                                                                                                | 9  |
| <b>Table S5:</b> The calculated Eckart tunneling factor via tight transition state channels over the wide range of temperature 299 – 468 K, based on the M06-2X/aug-cc-pVTZ level of theory.....                                                                                                                                                                                                                  | 10 |
| <b>Table S6:</b> Individual rate constants for Oxazole + OH $\rightarrow$ Products (cm <sup>3</sup> /molecule/s) at different pressures (0.76, 7.6, 76, 100, 750, 760, 7600, and 76000 Torr). (“Unc.” stands for the uncertainty). ....                                                                                                                                                                           | 10 |
| <b>Figure S1:</b> M06-2X/aug-cc-pVTZ optimized geometries for the species involved in the oxazole + OH reaction. All structures were obtained for the lowest-energy conformer of a given species. Bond lengths are in Å.....                                                                                                                                                                                      | 14 |
| <b>Figure S2:</b> The M06-2X/aug-cc-pVTZ ZPE-corrected energy profiles (0 K) used for the RC1 rate model. Numbers in parentheses, “( )”, are suggested by Shiroudi <i>et al.</i> <sup>3</sup> at the same level. Units are in kcal/mol. ....                                                                                                                                                                      | 14 |
| <b>Figure S3:</b> Plot of $K_{eq}$ for the reaction of oxazole + OH $\rightarrow$ RC1 ( $K_{eq} = [RC1]_{eq}/([OH]_{eq} \times [oxazole]_{eq})$ ) as a function of temperature ( $T = 299 - 468$ K). ....                                                                                                                                                                                                         | 15 |
| <b>Figure S4:</b> Hindrance potentials for the species involved in the oxazole + OH reaction, calculated at M06-2X/cc-pVDZ level of theory. ( <sup>[a]</sup> assumed as <b>TS3</b> ). ....                                                                                                                                                                                                                        | 20 |

**Table S1:** Optimized geometries, electronic energies at 0 K ( $E_{elec}^{0K}$ ), zero-point energy (ZPE) corrections and harmonic wavenumbers of the species involved with the lowest-energy conformer of a given species, calculated at the M06-2X/aug-cc-pVTZ level of theory for the title reaction. See Figure 1 (in the main text) for the notations.

| Species                                     | Cartesian coordinate (Å) |             |             | $E_{elec}^{0K}$ (Hartree) | ZPE (Hartree) | Unscaled vibrational frequencies <sup>[a]</sup> (cm <sup>-1</sup> ) |                                                      |           |           |
|---------------------------------------------|--------------------------|-------------|-------------|---------------------------|---------------|---------------------------------------------------------------------|------------------------------------------------------|-----------|-----------|
| <b>OH</b><br>(C <sub>ov</sub> )             | 8                        | 0.00000000  | 0.00000000  | 0.10799900                | -75.733789    | 0.008530                                                            | 3742.0378 (3737.8) <sup>1</sup>                      |           |           |
|                                             | 1                        | 0.00000000  | 0.00000000  | -0.86399500               |               |                                                                     |                                                      |           |           |
| <b>H<sub>2</sub>O</b><br>(C <sub>2v</sub> ) | 8                        | 0.00000000  | 0.00000000  | 0.11633200                | -76.4300922   | 0.021565                                                            | 1615.7190                                            | 3873.1681 | 3977.2474 |
|                                             | 1                        | 0.00000000  | 0.76268000  | -0.46532600               |               |                                                                     | (1595.0; 3657.0 <sup>2</sup> ; 3756.0 <sup>1</sup> ) |           |           |
|                                             | 1                        | 0.00000000  | -0.76268000 | -0.46532600               |               |                                                                     |                                                      |           |           |
| <b>H</b><br>(D <sub>oh</sub> )              | 1                        | 1.21619800  | -1.00826400 | 0.00000000                | -0.498207     | 0.00000                                                             | /                                                    |           |           |
| <b>Oxazole</b><br>(C <sub>s</sub> )         | 6                        | -0.59612800 | -0.95800600 | 0.00000000                | -246.070729   | 0.059464                                                            | 636.7748                                             | 672.7995  | 797.9645  |
|                                             | 6                        | 0.74776000  | -0.87631100 | 0.00000000                |               |                                                                     | 885.0241                                             | 915.1526  | 921.4602  |
|                                             | 6                        | 0.00000000  | 1.09568700  | 0.00000000                |               |                                                                     | 940.2646                                             | 1100.3657 | 1123.0928 |
|                                             | 1                        | -1.30823200 | -1.76135900 | 0.00000000                |               |                                                                     | 1148.6577                                            | 1204.8602 | 1283.0508 |
|                                             | 1                        | 1.47497700  | -1.66813600 | 0.00000000                |               |                                                                     | 1385.5414                                            | 1562.3750 | 1615.3641 |
|                                             | 1                        | -0.16574900 | 2.15928200  | 0.00000000                |               |                                                                     | 3291.0473                                            | 3292.7571 | 3325.3136 |
|                                             | 7                        | 1.11650000  | 0.46187300  | 0.00000000                |               |                                                                     |                                                      |           |           |
|                                             | 8                        | -1.09078600 | 0.30861100  | 0.00000000                |               |                                                                     |                                                      |           |           |
| <b>RC1</b><br>(C <sub>1</sub> )             | 6                        | 1.72101800  | 0.65209500  | -0.00018500               | -321.815627   | 0.070739                                                            | 27.5531                                              | 50.3706   | 153.0587  |
|                                             | 6                        | 0.45076000  | 1.09412900  | -0.00013600               |               |                                                                     | 510.7275                                             | 604.3560  | 639.0300  |
|                                             | 6                        | 0.38841400  | -1.02209900 | 0.00021100                |               |                                                                     | 678.2631                                             | 804.2877  | 892.7808  |
|                                             | 1                        | 2.68724500  | 1.11945800  | -0.00036600               |               |                                                                     | 918.5816                                             | 929.0307  | 949.0072  |
|                                             | 1                        | 0.07931000  | 2.10259500  | -0.00029000               |               |                                                                     | 1100.2549                                            | 1129.7351 | 1150.9743 |
|                                             | 1                        | 0.13002500  | -2.06686700 | 0.00037700                |               |                                                                     | 1218.1618                                            | 1284.9065 | 1386.9349 |
|                                             | 7                        | -0.39838800 | -0.00473500 | 0.00017600                |               |                                                                     | 1566.5702                                            | 1621.7838 | 3296.5116 |
|                                             | 8                        | 1.69015300  | -0.70840800 | 0.00003600                |               |                                                                     | 3297.5241                                            | 3327.8663 | 3512.5079 |
|                                             | 8                        | -3.33044800 | 0.02302800  | -0.00008000               |               |                                                                     |                                                      |           |           |
|                                             | 1                        | -2.34666600 | 0.01624800  | 0.00006300                |               |                                                                     |                                                      |           |           |
| <b>RC2</b><br>(C <sub>1</sub> )             | 6                        | 0.22409400  | 1.10285200  | 0.36920400                | -321.812220   | 0.070274                                                            | 53.9898                                              | 71.2194   | 150.1954  |
|                                             | 6                        | 0.01246200  | 0.02312300  | 1.14956100                |               |                                                                     | 259.4291                                             | 449.3223  | 635.3024  |
|                                             | 6                        | 1.01745700  | -0.63594000 | -0.58705200               |               |                                                                     | 673.6946                                             | 805.8382  | 886.2231  |
|                                             | 7                        | 0.52913300  | -1.09716100 | 0.50956700                |               |                                                                     | 914.2190                                             | 922.8671  | 940.5613  |
|                                             | 8                        | 0.87857800  | 0.69049100  | -0.74472300               |               |                                                                     | 1103.1085                                            | 1125.8072 | 1146.7449 |
|                                             | 8                        | -2.18576100 | -0.09397600 | -0.50597200               |               |                                                                     | 1205.7007                                            | 1283.5438 | 1383.9629 |

| Species                         | Cartesian coordinate<br>(Å) |              |              | $E_{elec}^{0K}$<br>(Hartree) | ZPE<br>(Hartree) | Unscaled vibrational frequencies <sup>[a]</sup> (cm <sup>-1</sup> ) |            |           |           |
|---------------------------------|-----------------------------|--------------|--------------|------------------------------|------------------|---------------------------------------------------------------------|------------|-----------|-----------|
|                                 | 1                           | -0.010112000 | 2.147786000  | 0.443259000                  |                  |                                                                     | 1559.0111  | 1605.5523 | 3294.1852 |
|                                 | 1                           | -0.473599000 | -0.036909000 | 2.106496000                  |                  |                                                                     | 3295.8570  | 3328.1194 | 3752.1552 |
|                                 | 1                           | 1.515339000  | -1.173458000 | -1.375499000                 |                  |                                                                     |            |           |           |
|                                 | 1                           | -1.802171000 | -0.969628000 | -0.325938000                 |                  |                                                                     |            |           |           |
| <b>TS0</b><br>(C <sub>1</sub> ) | 6                           | -0.637384000 | 1.129986000  | -0.059036000                 | -321.812101      | 0.070026                                                            | -32.4625   | 56.4346   | 125.7412  |
|                                 | 6                           | 0.056556000  | 0.550071000  | 0.938871000                  |                  |                                                                     | 317.6213   | 390.8075  | 635.1652  |
|                                 | 6                           | -0.860792000 | -0.993363000 | -0.175961000                 |                  |                                                                     | 675.0909   | 801.4452  | 886.6854  |
|                                 | 1                           | -0.799240000 | 2.140678000  | -0.382178000                 |                  |                                                                     | 912.1490   | 922.3681  | 940.5829  |
|                                 | 1                           | 0.657439000  | 1.007438000  | 1.703789000                  |                  |                                                                     | 1100.6451  | 1126.4619 | 1142.5448 |
|                                 | 1                           | -1.225847000 | -1.914209000 | -0.597014000                 |                  |                                                                     | 1207.1946  | 1283.1028 | 1383.0511 |
|                                 | 7                           | -0.097859000 | -0.829433000 | 0.845859000                  |                  |                                                                     | 1562.6880  | 1609.5644 | 3294.1036 |
|                                 | 8                           | -1.235502000 | 0.145588000  | -0.778971000                 |                  |                                                                     | 3296.4685  | 3328.8373 | 3739.0516 |
|                                 | 8                           | 2.319901000  | 0.009408000  | -0.568089000                 |                  |                                                                     |            |           |           |
|                                 | 1                           | 2.027188000  | -0.788014000 | -0.092371000                 |                  |                                                                     |            |           |           |
| <b>Abstraction channels</b>     |                             |              |              |                              |                  |                                                                     |            |           |           |
| <b>TS1</b><br>(C <sub>1</sub> ) | 6                           | 0.371146000  | -0.027998000 | 0.000282000                  | -321.787013      | 0.064025                                                            | -1791.7503 | 56.3438   | 91.7093   |
|                                 | 6                           | -1.683252000 | -0.570740000 | -0.000161000                 |                  |                                                                     | 190.9498   | 407.0605  | 573.4561  |
|                                 | 6                           | -1.566071000 | 0.769227000  | -0.000095000                 |                  |                                                                     | 632.7030   | 779.9621  | 795.0320  |
|                                 | 1                           | -2.335034000 | 1.520218000  | -0.000215000                 |                  |                                                                     | 803.0743   | 903.4646  | 913.3530  |
|                                 | 1                           | -2.502027000 | -1.265040000 | -0.000323000                 |                  |                                                                     | 954.5022   | 1101.3714 | 1129.3270 |
|                                 | 8                           | 2.805860000  | -0.101460000 | -0.000087000                 |                  |                                                                     | 1145.3307  | 1204.1924 | 1352.4921 |
|                                 | 8                           | -0.420420000 | -1.102868000 | 0.000054000                  |                  |                                                                     | 1446.5832  | 1577.6847 | 1629.5329 |
|                                 | 7                           | -0.209339000 | 1.103553000  | 0.000165000                  |                  |                                                                     | 3295.7156  | 3325.8193 | 3794.0470 |
|                                 | 1                           | 1.628687000  | -0.235600000 | 0.000515000                  |                  |                                                                     |            |           |           |
|                                 | 1                           | 2.859283000  | 0.867245000  | -0.001024000                 |                  |                                                                     |            |           |           |
| <b>TS2</b><br>(C <sub>1</sub> ) | 6                           | -0.525092000 | 1.129596000  | 0.000002000                  | -321.789082      | 0.064520                                                            | -1686.9089 | 95.4286   | 96.0232   |
|                                 | 6                           | -1.438270000 | -0.811567000 | 0.000002000                  |                  |                                                                     | 198.8532   | 408.2293  | 597.8720  |
|                                 | 6                           | 0.410019000  | 0.162859000  | -0.000016000                 |                  |                                                                     | 663.8153   | 755.9093  | 798.5073  |
|                                 | 1                           | -2.263275000 | -1.502609000 | 0.000009000                  |                  |                                                                     | 828.3227   | 887.9882  | 933.3386  |
|                                 | 1                           | -0.521261000 | 2.202028000  | 0.000005000                  |                  |                                                                     | 943.6355   | 1095.9607 | 1168.5822 |
|                                 | 8                           | 2.841865000  | 0.067907000  | -0.000004000                 |                  |                                                                     | 1192.2362  | 1250.4411 | 1353.0413 |
|                                 | 7                           | -0.176584000 | -1.071905000 | -0.000013000                 |                  |                                                                     | 1478.1242  | 1558.4704 | 1587.4050 |
|                                 | 8                           | -1.734618000 | 0.498182000  | 0.000011000                  |                  |                                                                     | 3294.8700  | 3333.3309 | 3800.5794 |
|                                 | 1                           | 1.665818000  | 0.291247000  | -0.000029000                 |                  |                                                                     |            |           |           |

| Species                         | Cartesian coordinate<br>(Å) |              |              |              | $E_{elec}^{0K}$<br>(Hartree) | ZPE<br>(Hartree) | Unscaled vibrational frequencies <sup>[a]</sup> (cm <sup>-1</sup> ) |           |           |
|---------------------------------|-----------------------------|--------------|--------------|--------------|------------------------------|------------------|---------------------------------------------------------------------|-----------|-----------|
|                                 | 1                           | 2.816887000  | -0.901363000 | 0.000127000  |                              |                  |                                                                     |           |           |
| <b>TS3</b><br>(C <sub>1</sub> ) | 6                           | -0.391273000 | 0.145365000  | -0.109589000 | -321.785808                  | 0.064256         | -1638.7196                                                          | 81.8274   | 110.8762  |
|                                 | 6                           | 1.557207000  | -0.682257000 | 0.043018000  |                              |                  | 152.3471                                                            | 381.7764  | 596.9248  |
|                                 | 6                           | 0.497606000  | 1.153111000  | -0.018862000 |                              |                  | 670.3165                                                            | 724.1507  | 873.8520  |
|                                 | 1                           | 0.333426000  | 2.214340000  | -0.023530000 |                              |                  | 884.0732                                                            | 894.7077  | 931.5417  |
|                                 | 1                           | 2.278242000  | -1.479977000 | 0.086803000  |                              |                  | 972.7428                                                            | 1098.6327 | 1152.2258 |
|                                 | 8                           | 0.258429000  | -1.035586000 | -0.057219000 |                              |                  | 1160.6057                                                           | 1249.6285 | 1332.9311 |
|                                 | 7                           | 1.762918000  | 0.585819000  | 0.067566000  |                              |                  | 1379.5567                                                           | 1530.1026 | 1604.9189 |
|                                 | 8                           | -2.813057000 | -0.023775000 | -0.031743000 |                              |                  | 3296.2529                                                           | 3311.0102 | 3813.9707 |
|                                 | 1                           | -1.668365000 | 0.103898000  | -0.238738000 |                              |                  |                                                                     |           |           |
|                                 | 1                           | -2.827947000 | -0.161409000 | 0.926801000  |                              |                  |                                                                     |           |           |
| <b>P1</b><br>(C <sub>s</sub> )  | 6                           | 0.000000000  | 1.082554000  | 0.000000000  | -245.374418                  | 0.046487         | 618.0690                                                            | 624.0449  | 788.3333  |
|                                 | 6                           | 1.069772000  | 0.268097000  | 0.000000000  |                              |                  | 892.0394                                                            | 901.4470  | 932.6202  |
|                                 | 6                           | -0.627104000 | -0.938299000 | 0.000000000  |                              |                  | 1075.6487                                                           | 1106.8643 | 1126.6834 |
|                                 | 7                           | 0.629358000  | -1.064984000 | 0.000000000  |                              |                  | 1192.8102                                                           | 1337.1069 | 1569.8687 |
|                                 | 8                           | -1.128026000 | 0.289785000  | 0.000000000  |                              |                  | 1618.3726                                                           | 3294.5008 | 3327.0308 |
|                                 | 1                           | -0.152655000 | 2.145003000  | 0.000000000  |                              |                  |                                                                     |           |           |
|                                 | 1                           | 2.115349000  | 0.517495000  | 0.000000000  |                              |                  |                                                                     |           |           |
| <b>P2</b><br>(C <sub>s</sub> )  | 6                           | -0.513485000 | -1.038813000 | 0.000000000  | -245.374966                  | 0.046846         | 618.8719                                                            | 671.8595  | 786.7383  |
|                                 | 6                           | 0.817335000  | -0.861849000 | 0.000000000  |                              |                  | 879.8643                                                            | 885.1457  | 938.6087  |
|                                 | 6                           | 0.000000000  | 1.045727000  | 0.000000000  |                              |                  | 1079.2258                                                           | 1159.8451 | 1200.5114 |
|                                 | 1                           | -0.201129000 | 2.102719000  | 0.000000000  |                              |                  | 1258.3242                                                           | 1359.7499 | 1528.3098 |
|                                 | 7                           | 1.145408000  | 0.448895000  | 0.000000000  |                              |                  | 1560.2032                                                           | 3295.8400 | 3339.8907 |
|                                 | 8                           | -1.056682000 | 0.219661000  | 0.000000000  |                              |                  |                                                                     |           |           |
|                                 | 1                           | -1.186373000 | -1.872656000 | 0.000000000  |                              |                  |                                                                     |           |           |
| <b>P3</b><br>(C <sub>s</sub> )  | 6                           | -0.658840000 | -0.957892000 | 0.000000000  | -245.370901                  | 0.046664         | 589.6886                                                            | 671.1587  | 857.7760  |
|                                 | 6                           | 0.685069000  | -0.965838000 | 0.000000000  |                              |                  | 865.2341                                                            | 892.0553  | 935.1308  |
|                                 | 6                           | 0.000000000  | 1.048585000  | 0.000000000  |                              |                  | 1084.2179                                                           | 1120.5949 | 1151.3254 |
|                                 | 1                           | 1.375111000  | -1.787347000 | 0.000000000  |                              |                  | 1246.2106                                                           | 1353.1233 | 1502.7057 |
|                                 | 1                           | -0.128668000 | 2.116711000  | 0.000000000  |                              |                  | 1596.3059                                                           | 3297.9591 | 3319.7053 |
|                                 | 7                           | 1.088346000  | 0.368522000  | 0.000000000  |                              |                  |                                                                     |           |           |
|                                 | 8                           | -1.127780000 | 0.292732000  | 0.000000000  |                              |                  |                                                                     |           |           |
|                                 |                             |              |              |              |                              |                  |                                                                     |           |           |
| <b>Addition channels</b>        |                             |              |              |              |                              |                  |                                                                     |           |           |
| <b>TS4</b><br>(C <sub>1</sub> ) | 6                           | -1.291409000 | -0.494564000 | -0.449208000 | -321.807206                  | 0.070611         | -514.0005                                                           | 148.1643  | 188.9194  |
|                                 | 6                           | -1.127195000 | 0.841057000  | -0.275618000 |                              |                  | 272.9454                                                            | 609.9035  | 637.0587  |

| Species                         | Cartesian coordinate<br>(Å) |              |              | $E_{elec}^{0K}$<br>(Hartree) | ZPE<br>(Hartree) | Unscaled vibrational frequencies <sup>[a]</sup> (cm <sup>-1</sup> ) |            |           |           |
|---------------------------------|-----------------------------|--------------|--------------|------------------------------|------------------|---------------------------------------------------------------------|------------|-----------|-----------|
|                                 | 6                           | 0.425509000  | -0.146229000 | 0.774611000                  |                  |                                                                     | 715.3770   | 808.4276  | 870.9678  |
|                                 | 7                           | -0.045876000 | 1.054233000  | 0.536914000                  |                  |                                                                     | 915.5789   | 923.6861  | 934.7299  |
|                                 | 8                           | -0.328286000 | -1.131315000 | 0.247748000                  |                  |                                                                     | 1108.6563  | 1119.9676 | 1169.5641 |
|                                 | 8                           | 1.933297000  | -0.067970000 | -0.641284000                 |                  |                                                                     | 1193.5030  | 1276.5411 | 1344.6938 |
|                                 | 1                           | -1.988979000 | -1.102886000 | -0.994199000                 |                  |                                                                     | 1501.4839  | 1549.3957 | 3287.0272 |
|                                 | 1                           | -1.711942000 | 1.648337000  | -0.679036000                 |                  |                                                                     | 3303.6364  | 3320.3071 | 3794.1098 |
|                                 | 1                           | 1.160540000  | -0.427646000 | 1.506332000                  |                  |                                                                     |            |           |           |
|                                 | 1                           | 1.980004000  | 0.895263000  | -0.741918000                 |                  |                                                                     |            |           |           |
| <b>TS5</b><br>(C <sub>1</sub> ) | 6                           | 0.111160000  | 1.079124000  | 0.343664000                  | -321.803989      | 0.070584                                                            | -468.2233  | 121.6401  | 155.7664  |
|                                 | 6                           | -0.498930000 | -0.070781000 | 0.792978000                  |                  |                                                                     | 222.6002   | 557.3184  | 645.1855  |
|                                 | 6                           | 1.228288000  | -0.624971000 | -0.305915000                 |                  |                                                                     | 774.6482   | 818.8873  | 901.8642  |
|                                 | 7                           | 0.295102000  | -1.152547000 | 0.389930000                  |                  |                                                                     | 909.1226   | 927.1083  | 939.2520  |
|                                 | 8                           | 1.186774000  | 0.727406000  | -0.386693000                 |                  |                                                                     | 1094.5937  | 1100.9099 | 1126.6484 |
|                                 | 8                           | -1.949152000 | -0.006632000 | -0.593209000                 |                  |                                                                     | 1185.6024  | 1283.5110 | 1381.0300 |
|                                 | 1                           | -0.139208000 | 2.121583000  | 0.396279000                  |                  |                                                                     | 1491.9882  | 1616.2212 | 3292.2872 |
|                                 | 1                           | -1.238563000 | -0.173531000 | 1.563702000                  |                  |                                                                     | 3304.9067  | 3325.7505 | 3805.8382 |
|                                 | 1                           | 2.036202000  | -1.112586000 | -0.824342000                 |                  |                                                                     |            |           |           |
|                                 | 1                           | -1.668219000 | -0.834054000 | -1.010296000                 |                  |                                                                     |            |           |           |
| <b>TS6</b><br>(C <sub>1</sub> ) | 6                           | -0.408062000 | -0.206921000 | 0.815751000                  | -321.809542      | 0.070523                                                            | -343.3531  | 122.4405  | 146.0179  |
|                                 | 6                           | 0.071357000  | 1.032397000  | 0.481862000                  |                  |                                                                     | 222.0139   | 598.2260  | 653.7705  |
|                                 | 6                           | 1.302513000  | -0.396420000 | -0.453517000                 |                  |                                                                     | 700.0912   | 848.3477  | 883.7214  |
|                                 | 1                           | -1.131740000 | -0.561841000 | 1.522877000                  |                  |                                                                     | 904.3972   | 920.1868  | 940.0978  |
|                                 | 1                           | -0.312203000 | 1.995929000  | 0.766204000                  |                  |                                                                     | 1105.7141  | 1111.5498 | 1162.0219 |
|                                 | 1                           | 2.041615000  | -0.939468000 | -1.016888000                 |                  |                                                                     | 1192.9180  | 1284.1521 | 1368.2273 |
|                                 | 7                           | 1.151909000  | 0.880210000  | -0.358369000                 |                  |                                                                     | 1500.7400  | 1577.7509 | 3291.9071 |
|                                 | 8                           | 0.418182000  | -1.120836000 | 0.253082000                  |                  |                                                                     | 3294.6426  | 3334.8318 | 3792.2030 |
|                                 | 8                           | -2.011063000 | -0.106988000 | -0.583468000                 |                  |                                                                     |            |           |           |
|                                 | 1                           | -1.712839000 | 0.592171000  | -1.185104000                 |                  |                                                                     |            |           |           |
| <b>TS7</b><br>(C <sub>1</sub> ) | 6                           | -1.391033000 | -0.639498000 | -0.043468000                 | -321.798411      | 0.066377                                                            | -1078.6398 | 312.7456  | 335.1122  |
|                                 | 6                           | -1.369854000 | 0.709842000  | -0.052079000                 |                  |                                                                     | 440.6915   | 551.7050  | 581.8007  |
|                                 | 6                           | 0.628672000  | 0.044293000  | 0.078788000                  |                  |                                                                     | 635.5599   | 738.0695  | 774.4055  |
|                                 | 7                           | -0.064401000 | 1.151760000  | -0.027464000                 |                  |                                                                     | 820.7407   | 910.5592  | 934.2361  |
|                                 | 8                           | -0.100444000 | -1.084610000 | -0.018868000                 |                  |                                                                     | 989.7768   | 1117.3518 | 1148.1358 |
|                                 | 8                           | 1.935645000  | -0.114947000 | -0.133129000                 |                  |                                                                     | 1180.8259  | 1218.1048 | 1327.3126 |
|                                 | 1                           | -2.163274000 | -1.384419000 | -0.047656000                 |                  |                                                                     | 1485.0498  | 1572.4475 | 1583.9125 |

| Species                         | Cartesian coordinate<br>(Å) |              |              | $E_{elec}^{0K}$<br>(Hartree) | ZPE<br>(Hartree) | Unscaled vibrational frequencies <sup>[a]</sup> (cm <sup>-1</sup> ) |            |           |           |
|---------------------------------|-----------------------------|--------------|--------------|------------------------------|------------------|---------------------------------------------------------------------|------------|-----------|-----------|
|                                 | 1                           | -2.200998000 | 1.391307000  | -0.074865000                 |                  |                                                                     | 3291.4649  | 3330.8298 | 3855.4808 |
|                                 | 1                           | 0.595760000  | 0.075979000  | 1.800613000                  |                  |                                                                     |            |           |           |
|                                 | 1                           | 2.331003000  | 0.763445000  | -0.169307000                 |                  |                                                                     |            |           |           |
| <b>TS8</b><br>(C <sub>1</sub> ) | 6                           | 0.178657000  | 1.111341000  | -0.029601000                 | -321.788855      | 0.066080                                                            | -1134.4803 | 241.8096  | 303.5017  |
|                                 | 6                           | -0.674120000 | 0.038664000  | 0.080231000                  |                  |                                                                     | 417.6370   | 549.4946  | 609.2550  |
|                                 | 6                           | 1.291066000  | -0.727023000 | -0.042415000                 |                  |                                                                     | 622.3695   | 686.1156  | 746.4252  |
|                                 | 7                           | 0.079286000  | -1.136499000 | -0.023188000                 |                  |                                                                     | 817.1797   | 907.6352  | 929.2475  |
|                                 | 8                           | 1.445098000  | 0.609625000  | -0.032374000                 |                  |                                                                     | 1004.8741  | 1093.9471 | 1160.2885 |
|                                 | 8                           | -1.998296000 | 0.053928000  | -0.181412000                 |                  |                                                                     | 1213.3088  | 1276.0044 | 1331.2930 |
|                                 | 1                           | 0.050009000  | 2.175143000  | 0.001884000                  |                  |                                                                     | 1389.2319  | 1599.8983 | 1630.3736 |
|                                 | 1                           | -0.768234000 | 0.026850000  | 1.762436000                  |                  |                                                                     | 3289.1703  | 3333.9681 | 3852.6267 |
|                                 | 1                           | 2.190813000  | -1.317850000 | -0.073175000                 |                  |                                                                     |            |           |           |
|                                 | 1                           | -2.375638000 | -0.774964000 | 0.132173000                  |                  |                                                                     |            |           |           |
| <b>TS9</b><br>(C <sub>1</sub> ) | 6                           | -0.653368000 | 0.087736000  | 0.033999000                  | -321.793757      | 0.065624                                                            | -812.1535  | 214.2445  | 300.6564  |
|                                 | 6                           | 0.218617000  | 1.138402000  | -0.031872000                 |                  |                                                                     | 411.2220   | 498.9767  | 525.6702  |
|                                 | 6                           | 1.360670000  | -0.637670000 | -0.024474000                 |                  |                                                                     | 661.1747   | 691.8485  | 735.6612  |
|                                 | 1                           | -0.702640000 | 0.105928000  | 1.859805000                  |                  |                                                                     | 846.8297   | 871.2586  | 934.6531  |
|                                 | 1                           | -0.009863000 | 2.188238000  | -0.018899000                 |                  |                                                                     | 997.8421   | 1139.6751 | 1170.7092 |
|                                 | 1                           | 2.126290000  | -1.393791000 | -0.012067000                 |                  |                                                                     | 1211.8113  | 1277.3117 | 1292.8493 |
|                                 | 7                           | 1.502729000  | 0.641106000  | -0.031278000                 |                  |                                                                     | 1382.8292  | 1569.6335 | 1647.9333 |
|                                 | 8                           | 0.080261000  | -1.062322000 | -0.040842000                 |                  |                                                                     | 3294.9385  | 3303.3981 | 3824.5681 |
|                                 | 8                           | -1.967284000 | 0.014399000  | -0.201937000                 |                  |                                                                     |            |           |           |
|                                 | 1                           | -2.392219000 | -0.535535000 | 0.466411000                  |                  |                                                                     |            |           |           |
| <b>P4</b><br>(C <sub>s</sub> )  | 6                           | -1.385670000 | -0.634986000 | -0.000608000                 | -321.310927      | 0.064331                                                            | 307.5991   | 426.7563  | 457.2223  |
|                                 | 6                           | -1.361527000 | 0.706528000  | 0.000622000                  |                  |                                                                     | 629.3045   | 740.2670  | 743.6521  |
|                                 | 6                           | 0.632343000  | 0.050057000  | 0.000062000                  |                  |                                                                     | 784.2251   | 907.7183  | 935.5118  |
|                                 | 7                           | -0.038324000 | 1.145455000  | -0.000525000                 |                  |                                                                     | 1003.9828  | 1108.2961 | 1145.8017 |
|                                 | 8                           | -0.080345000 | -1.073955000 | 0.000442000                  |                  |                                                                     | 1185.6279  | 1237.3139 | 1320.6971 |
|                                 | 8                           | 1.948400000  | -0.115533000 | -0.000029000                 |                  |                                                                     | 1520.1798  | 1613.1542 | 1686.2423 |
|                                 | 1                           | -2.148968000 | -1.388533000 | -0.001136000                 |                  |                                                                     | 3292.6002  | 3335.1537 | 3856.6423 |
|                                 | 1                           | -2.186761000 | 1.395426000  | 0.000994000                  |                  |                                                                     |            |           |           |
|                                 | 1                           | 2.348675000  | 0.761240000  | 0.000052000                  |                  |                                                                     |            |           |           |
| <b>P5</b><br>(C <sub>s</sub> )  | 6                           | 0.165343000  | 1.109716000  | -0.000019000                 | -321.303968      | 0.064038                                                            | 309.6683   | 338.3939  | 424.4395  |
|                                 | 6                           | -0.678771000 | 0.056906000  | -0.000013000                 |                  |                                                                     | 643.2671   | 703.6299  | 706.5179  |
|                                 | 6                           | 1.268681000  | -0.730927000 | -0.000039000                 |                  |                                                                     | 767.8086   | 888.3554  | 944.6532  |

| Species                        | Cartesian coordinate<br>(Å) |              |              | $E_{elec}^{0K}$<br>(Hartree) | ZPE<br>(Hartree) | Unscaled vibrational frequencies <sup>[a]</sup> (cm <sup>-1</sup> ) |           |           |           |
|--------------------------------|-----------------------------|--------------|--------------|------------------------------|------------------|---------------------------------------------------------------------|-----------|-----------|-----------|
|                                | 7                           | 0.038620000  | -1.117065000 | 0.000040000                  |                  |                                                                     | 1027.9925 | 1096.5891 | 1170.2003 |
|                                | 8                           | 1.434885000  | 0.591574000  | 0.000037000                  |                  |                                                                     | 1232.9816 | 1279.6055 | 1352.2901 |
|                                | 8                           | -2.021713000 | 0.061855000  | -0.000032000                 |                  |                                                                     | 1415.2086 | 1583.6906 | 1725.8241 |
|                                | 1                           | 0.054792000  | 2.175418000  | -0.000023000                 |                  |                                                                     | 3294.4556 | 3340.1582 | 3863.8566 |
|                                | 1                           | 2.154071000  | -1.342802000 | -0.000009000                 |                  |                                                                     |           |           |           |
|                                | 1                           | -2.316088000 | -0.854767000 | 0.000133000                  |                  |                                                                     |           |           |           |
| <b>P6</b><br>(C <sub>s</sub> ) | 6                           | 0.657225000  | 0.122127000  | 0.000006000                  | -321.300660      | 0.063365                                                            | 112.0359  | 311.4878  | 426.1972  |
|                                | 6                           | -0.216009000 | 1.147916000  | 0.000014000                  |                  |                                                                     | 668.7776  | 695.4818  | 707.5113  |
|                                | 6                           | -1.336165000 | -0.655643000 | -0.000003000                 |                  |                                                                     | 825.0641  | 835.4580  | 939.7754  |
|                                | 1                           | -0.020825000 | 2.203239000  | 0.000028000                  |                  |                                                                     | 1013.3539 | 1118.7507 | 1135.7609 |
|                                | 1                           | -2.071285000 | -1.440501000 | 0.000009000                  |                  |                                                                     | 1182.5671 | 1278.9314 | 1301.8749 |
|                                | 7                           | -1.501205000 | 0.610709000  | -0.000012000                 |                  |                                                                     | 1440.2541 | 1610.0760 | 1723.4487 |
|                                | 8                           | -0.027955000 | -1.042646000 | -0.000010000                 |                  |                                                                     | 3302.8473 | 3314.6731 | 3869.6214 |
|                                | 8                           | 1.990403000  | 0.059764000  | -0.000058000                 |                  |                                                                     |           |           |           |
|                                | 1                           | 2.270649000  | -0.861053000 | 0.000484000                  |                  |                                                                     |           |           |           |

Frequencies in the parentheses (“( )”) are taken from experimental studies.

**Table S2:** Calculated overall rate constants,  $k_{tot}$ , of the oxazole + OH → products over the range of temperature 299 – 468 K at different pressures, including the HIR treatments, Eckart quantum tunneling effects. Units are in cm<sup>3</sup>/molecule/s.

| T (K) | 0.76 Torr | 7.6 Torr | 76 Torr  | 100 Torr | 750 Torr | 760 Torr | 7600 Torr | 76000 Torr |
|-------|-----------|----------|----------|----------|----------|----------|-----------|------------|
| 299   | 8.72E-12  | 9.39E-12 | 9.62E-12 | 9.65E-12 | 1.07E-11 | 1.07E-11 | 1.56E-11  | 4.60E-11   |
| 324   | 7.57E-12  | 8.37E-12 | 8.55E-12 | 8.57E-12 | 9.30E-12 | 9.31E-12 | 1.23E-11  | 2.72E-11   |
| 348   | 6.56E-12  | 7.50E-12 | 7.67E-12 | 7.71E-12 | 8.22E-12 | 8.21E-12 | 1.02E-11  | 1.79E-11   |
| 373   | 5.60E-12  | 6.65E-12 | 6.87E-12 | 6.88E-12 | 7.24E-12 | 7.25E-12 | 8.63E-12  | 1.28E-11   |
| 398   | 4.73E-12  | 5.92E-12 | 6.15E-12 | 6.16E-12 | 6.42E-12 | 6.43E-12 | 7.41E-12  | 1.02E-11   |
| 423   | 3.93E-12  | 5.25E-12 | 5.49E-12 | 5.52E-12 | 5.70E-12 | 5.69E-12 | 6.39E-12  | 8.38E-12   |
| 449   | 3.25E-12  | 4.62E-12 | 4.91E-12 | 4.92E-12 | 5.07E-12 | 5.09E-12 | 5.61E-12  | 7.10E-12   |
| 468   | 2.83E-12  | 4.21E-12 | 4.51E-12 | 4.54E-12 | 4.66E-12 | 4.65E-12 | 5.11E-12  | 6.36E-12   |



**Table S3:** Comparison of the zero-point energy corrected relative energies (in kcal·mol<sup>-1</sup>) of all species involved in the title reaction calculated at the same methods, M06-2X/aug-cc-pVTZ and ROCBS-QB3//M06-2X/aug-cc-pVTZ, by this work and Shiroudi *et al.*<sup>3</sup> (0 K). The numbers are relative to the energies of oxazole + OH. See Fig. 1 for the species notations.

| Species                    | M06-2X/aug-cc-pVTZ |                                     | ROCBS-QB3//M06-2X/aug-cc-pVTZ |                                     |
|----------------------------|--------------------|-------------------------------------|-------------------------------|-------------------------------------|
|                            | This work          | Shiroudi <i>et al.</i> <sup>3</sup> | This work                     | Shiroudi <i>et al.</i> <sup>3</sup> |
| <b>RC1</b>                 | -5.3               | -3.3                                | -5.4                          | -2.3                                |
| <b>RC2</b>                 | -3.5               | -3.5                                | -2.3                          | -2.3                                |
| <b>TS0</b>                 | -3.5               | N/A                                 | -2.6                          | N/A                                 |
| <b>TS1</b>                 | 8.5                | 8.3                                 | 8.7                           | 8.4                                 |
| <b>TS2</b>                 | 7.5                | 7.4                                 | 7.6                           | 7.4                                 |
| <b>TS3</b>                 | 9.4                | 9.4                                 | 8.8                           | 8.9                                 |
| <b>TS4</b>                 | -0.1               | -0.2                                | -0.8                          | -1.0                                |
| <b>TS5</b>                 | 2.0                | 2.0                                 | 0.5                           | 0.6                                 |
| <b>TS6</b>                 | -1.6               | -1.6                                | -2.2                          | -2.3                                |
| <b>TS7</b>                 | 2.8                | N/A                                 | 4.3                           | N/A                                 |
| <b>TS8</b>                 | 8.6                | N/A                                 | 9.0                           | N/A                                 |
| <b>TS9</b>                 | 5.3                | N/A                                 | 6.3                           | N/A                                 |
| <b>I1</b>                  | -34.3              | -34.1                               | -34.3                         | -34.1                               |
| <b>I2</b>                  | -20.6              | -20.3                               | -20.1                         | -19.9                               |
| <b>I3</b>                  | -32.3              | -32.1                               | -32.4                         | -32.3                               |
| <b>P1 + H<sub>2</sub>O</b> | 0.0                | 0.2                                 | 1.0                           | 1.1                                 |
| <b>P2 + H<sub>2</sub>O</b> | -0.1               | 0.0                                 | 0.8                           | 1.0                                 |
| <b>P3 + H<sub>2</sub>O</b> | 2.4                | 2.4                                 | 3.2                           | 3.3                                 |
| <b>P4 + H</b>              | -5.2               | N/A                                 | -3.3                          | N/A                                 |
| <b>P5 + H</b>              | -1.0               | N/A                                 | 0.4                           | N/A                                 |
| <b>P6 + H</b>              | 0.6                | N/A                                 | 2.4                           | N/A                                 |
| <b>MAD (kcal/mol)</b>      | <b>0.25</b>        |                                     | <b>0.35</b>                   |                                     |

**Table S4:** Calculated overall rate constants,  $k_{tot}$ , of the oxazole + OH  $\rightarrow$  products over the range of temperature 299 – 468 K at  $P = 100$  Torr with and without HIR treatments based on M06-2X/aug-cc-pVTZ level of theory. Units are in cm<sup>3</sup>/molecule/s.

| T (K) | Oxazole + OH $\rightarrow$ products ( $k_{tot}$ ) |             | HIR factor |
|-------|---------------------------------------------------|-------------|------------|
|       | With HIR                                          | Without HIR |            |
| 299   | 9.65E-12                                          | 6.30E-12    | 1.53       |
| 324   | 8.57E-12                                          | 5.60E-12    | 1.53       |
| 348   | 7.71E-12                                          | 5.03E-12    | 1.53       |
| 373   | 6.88E-12                                          | 4.50E-12    | 1.53       |
| 398   | 6.16E-12                                          | 4.03E-12    | 1.53       |
| 423   | 5.52E-12                                          | 3.62E-12    | 1.52       |
| 449   | 4.92E-12                                          | 3.24E-12    | 1.52       |
| 468   | 4.54E-12                                          | 3.00E-12    | 1.51       |

**Table S5:** The calculated Eckart tunneling factor via tight transition state channels over the wide range of temperature 299 – 468 K, based on the M06-2X/aug-cc-pVTZ level of theory.

| T (K) | via TS1 | via TS2 | via TS3 | via TS4 | via TS5 | via TS6 | via TS7 | via TS8 | via TS9 |
|-------|---------|---------|---------|---------|---------|---------|---------|---------|---------|
| 299   | 30.0    | 18.7    | 16.9    | 1.3     | 1.3     | 1.1     | 3.6     | 4.4     | 1.9     |
| 324   | 17.6    | 11.9    | 10.9    | 1.3     | 1.2     | 1.1     | 2.9     | 3.4     | 1.7     |
| 348   | 11.8    | 8.5     | 7.8     | 1.2     | 1.2     | 1.1     | 2.5     | 2.8     | 1.6     |
| 373   | 8.5     | 6.4     | 5.9     | 1.2     | 1.2     | 1.1     | 2.2     | 2.5     | 1.5     |
| 398   | 6.5     | 5.1     | 4.8     | 1.2     | 1.1     | 1.1     | 2.0     | 2.2     | 1.4     |
| 423   | 5.2     | 4.3     | 4.0     | 1.1     | 1.1     | 1.1     | 1.8     | 2.0     | 1.4     |
| 449   | 4.3     | 3.6     | 3.4     | 1.1     | 1.1     | 1.1     | 1.7     | 1.8     | 1.3     |
| 468   | 3.9     | 3.3     | 3.1     | 1.1     | 1.1     | 1.1     | 1.6     | 1.7     | 1.3     |

**Table S6:** Individual rate constants for Oxazole + OH → Products (cm<sup>3</sup>/molecule/s) at different pressures (0.76, 7.6, 76, 100, 750, 760, 7600, and 76000 Torr). (“Unc.” stands for the uncertainty).

| P = 0.76 Torr |          |          |          |          |          |          |                       |          |                       |          |                       |          |
|---------------|----------|----------|----------|----------|----------|----------|-----------------------|----------|-----------------------|----------|-----------------------|----------|
| T (K)         | I1       | Unc. (%) | I2       | Unc. (%) | I3       | Unc. (%) | P1 + H <sub>2</sub> O | Unc. (%) | P2 + H <sub>2</sub> O | Unc. (%) | P3 + H <sub>2</sub> O | Unc. (%) |
| 299           | 4.93E-13 | 4.10E-03 | 1.06E-14 | 1.90E-01 | 8.21E-12 | 2.40E-04 | 8.00E-17              | 2.50E+01 | 1.20E-16              | 1.70E+01 | 4.00E-17              | 5.00E+01 |
| 324           | 4.77E-13 | 4.20E-03 | 1.15E-14 | 1.70E-01 | 7.08E-12 | 2.80E-04 | 2.20E-16              | 9.10E+00 | 1.60E-16              | 1.20E+01 | 2.00E-17              | 1.00E+02 |
| 348           | 4.56E-13 | 4.40E-03 | 1.41E-14 | 1.40E-01 | 6.09E-12 | 3.30E-04 | 3.20E-16              | 6.20E+00 | 5.40E-16              | 3.70E+00 | 2.00E-17              | 1.00E+02 |
| 373           | 4.38E-13 | 4.60E-03 | 1.41E-14 | 1.40E-01 | 5.15E-12 | 3.90E-04 | 6.40E-16              | 3.10E+00 | 9.20E-16              | 2.20E+00 | 4.00E-17              | 5.00E+01 |
| 398           | 4.18E-13 | 4.80E-03 | 1.34E-14 | 1.50E-01 | 4.30E-12 | 4.70E-04 | 6.20E-16              | 3.20E+00 | 1.34E-15              | 1.50E+00 | 6.00E-17              | 3.30E+01 |
| 423           | 4.06E-13 | 4.90E-03 | 1.28E-14 | 1.60E-01 | 3.51E-12 | 5.70E-04 | 1.42E-15              | 1.40E+00 | 1.94E-15              | 1.00E+00 | 2.20E-16              | 9.10E+00 |
| 449           | 3.80E-13 | 5.30E-03 | 1.19E-14 | 1.70E-01 | 2.85E-12 | 7.00E-04 | 2.34E-15              | 8.50E-01 | 2.70E-15              | 7.40E-01 | 3.80E-16              | 5.30E+00 |
| 468           | 3.65E-13 | 5.50E-03 | 1.16E-14 | 1.70E-01 | 2.44E-12 | 8.20E-04 | 3.28E-15              | 6.10E-01 | 3.96E-15              | 5.10E-01 | 5.00E-16              | 4.00E+00 |
| P = 7.6 Torr  |          |          |          |          |          |          |                       |          |                       |          |                       |          |
| T (K)         | I1       | Unc. (%) | I2       | Unc. (%) | I3       | Unc. (%) | P1 + H <sub>2</sub> O | Unc. (%) | P2 + H <sub>2</sub> O | Unc. (%) | P3 + H <sub>2</sub> O | Unc. (%) |
| 299           | 4.75E-13 | 4.20E-03 | 1.19E-14 | 1.70E-01 | 8.90E-12 | 2.20E-04 | 8.00E-17              | 2.50E+01 | 1.00E-16              | 2.00E+01 | 2.00E-17              | 1.00E+02 |
| 324           | 4.48E-13 | 4.50E-03 | 1.40E-14 | 1.40E-01 | 7.91E-12 | 2.50E-04 | 1.60E-16              | 1.20E+01 | 2.60E-16              | 7.70E+00 | 2.00E-17              | 1.00E+02 |
| 348           | 4.25E-13 | 4.70E-03 | 1.55E-14 | 1.30E-01 | 7.06E-12 | 2.80E-04 | 2.80E-16              | 7.10E+00 | 4.60E-16              | 4.30E+00 | 4.00E-17              | 5.00E+01 |
| 373           | 4.07E-13 | 4.90E-03 | 1.72E-14 | 1.20E-01 | 6.23E-12 | 3.20E-04 | 5.80E-16              | 3.40E+00 | 9.00E-16              | 2.20E+00 | 1.20E-16              | 1.70E+01 |
| 398           | 3.84E-13 | 5.20E-03 | 1.84E-14 | 1.10E-01 | 5.52E-12 | 3.60E-04 | 7.80E-16              | 2.60E+00 | 1.38E-15              | 1.40E+00 | 1.80E-16              | 1.10E+01 |
| 423           | 3.74E-13 | 5.30E-03 | 1.92E-14 | 1.00E-01 | 4.86E-12 | 4.10E-04 | 1.42E-15              | 1.40E+00 | 2.14E-15              | 9.30E-01 | 1.60E-16              | 1.20E+01 |
| 449           | 3.61E-13 | 5.50E-03 | 2.05E-14 | 9.70E-02 | 4.24E-12 | 4.70E-04 | 2.20E-15              | 9.10E-01 | 3.50E-15              | 5.70E-01 | 4.20E-16              | 4.80E+00 |
| 468           | 3.44E-13 | 5.80E-03 | 2.06E-14 | 9.70E-02 | 3.84E-12 | 5.20E-04 | 2.92E-15              | 6.80E-01 | 4.44E-15              | 4.50E-01 | 3.80E-16              | 5.30E+00 |
| P = 76 Torr   |          |          |          |          |          |          |                       |          |                       |          |                       |          |
| T (K)         | I1       | Unc. (%) | I2       | Unc. (%) | I3       | Unc. (%) | P1 + H <sub>2</sub> O | Unc. (%) | P2 + H <sub>2</sub> O | Unc. (%) | P3 + H <sub>2</sub> O | Unc. (%) |
| 299           | 4.76E-13 | 4.20E-03 | 1.08E-14 | 1.90E-01 | 9.13E-12 | 2.20E-04 | 1.20E-16              | 1.70E+01 | 1.00E-16              | 2.00E+01 | 2.00E-17              | 1.00E+02 |
| 324           | 4.43E-13 | 4.50E-03 | 1.25E-14 | 1.60E-01 | 8.09E-12 | 2.50E-04 | 1.40E-16              | 1.40E+01 | 2.20E-16              | 9.10E+00 | 2.00E-17              | 1.00E+02 |
| 348           | 4.17E-13 | 4.80E-03 | 1.56E-14 | 1.30E-01 | 7.23E-12 | 2.80E-04 | 4.00E-16              | 5.00E+00 | 3.40E-16              | 5.90E+00 | 2.00E-17              | 1.00E+02 |
| 373           | 3.94E-13 | 5.10E-03 | 1.73E-14 | 1.20E-01 | 6.45E-12 | 3.10E-04 | 5.40E-16              | 3.70E+00 | 8.40E-16              | 2.40E+00 | 6.00E-17              | 3.30E+01 |
| 398           | 3.70E-13 | 5.40E-03 | 2.01E-14 | 1.00E-01 | 5.76E-12 | 3.50E-04 | 8.40E-16              | 2.40E+00 | 1.28E-15              | 1.60E+00 | 2.00E-17              | 1.00E+02 |
| 423           | 3.50E-13 | 5.70E-03 | 1.92E-14 | 1.00E-01 | 5.12E-12 | 3.90E-04 | 1.28E-15              | 1.60E+00 | 1.76E-15              | 1.10E+00 | 1.40E-16              | 1.40E+01 |
| 449           | 3.27E-13 | 6.10E-03 | 2.19E-14 | 9.10E-02 | 4.56E-12 | 4.40E-04 | 2.12E-15              | 9.40E-01 | 3.20E-15              | 6.20E-01 | 3.40E-16              | 5.90E+00 |
| 468           | 3.14E-13 | 6.40E-03 | 2.28E-14 | 8.80E-02 | 4.16E-12 | 4.80E-04 | 2.68E-15              | 7.50E-01 | 4.36E-15              | 4.60E-01 | 5.20E-16              | 3.80E+00 |
| P = 100 Torr  |          |          |          |          |          |          |                       |          |                       |          |                       |          |
| T (K)         | I1       | Unc. (%) | I2       | Unc. (%) | I3       | Unc. (%) | P1 + H <sub>2</sub> O | Unc. (%) | P2 + H <sub>2</sub> O | Unc. (%) | P3 + H <sub>2</sub> O | Unc. (%) |
| 299           | 4.78E-13 | 4.20E-03 | 1.14E-14 | 1.80E-01 | 9.16E-12 | 2.20E-04 | 2.00E-17              | 1.00E+02 | 8.00E-17              | 2.50E+01 | 2.00E-17              | 1.00E+02 |
| 324           | 4.40E-13 | 4.50E-03 | 1.42E-14 | 1.40E-01 | 8.12E-12 | 2.50E-04 | 1.20E-16              | 1.70E+01 | 3.80E-16              | 5.30E+00 | 2.00E-17              | 1.00E+02 |
| 348           | 4.18E-13 | 4.80E-03 | 1.65E-14 | 1.20E-01 | 7.28E-12 | 2.70E-04 | 2.80E-16              | 7.10E+00 | 5.20E-16              | 3.80E+00 | 2.00E-17              | 1.00E+02 |
| 373           | 3.95E-13 | 5.10E-03 | 1.72E-14 | 1.20E-01 | 6.47E-12 | 3.10E-04 | 4.00E-16              | 5.00E+00 | 4.80E-16              | 4.20E+00 | 8.00E-17              | 2.50E+01 |
| 398           | 3.68E-13 | 5.40E-03 | 1.94E-14 | 1.00E-01 | 5.77E-12 | 3.50E-04 | 1.08E-15              | 1.90E+00 | 1.46E-15              | 1.40E+00 | 1.00E-16              | 2.00E+01 |
| 423           | 3.46E-13 | 5.80E-03 | 2.11E-14 | 9.50E-02 | 5.14E-12 | 3.90E-04 | 1.38E-15              | 1.40E+00 | 2.44E-15              | 8.20E-01 | 1.20E-16              | 1.70E+01 |
| 449           | 3.23E-13 | 6.20E-03 | 2.20E-14 | 9.10E-02 | 4.57E-12 | 4.40E-04 | 2.60E-15              | 7.70E-01 | 3.46E-15              | 5.80E-01 | 3.40E-16              | 5.90E+00 |
| 468           | 3.13E-13 | 6.40E-03 | 2.34E-14 | 8.50E-02 | 4.20E-12 | 4.80E-04 | 3.46E-15              | 5.80E-01 | 4.52E-15              | 4.40E-01 | 4.40E-16              | 4.50E+00 |
| P = 750 Torr  |          |          |          |          |          |          |                       |          |                       |          |                       |          |
| T (K)         | I1       | Unc. (%) | I2       | Unc. (%) | I3       | Unc. (%) | P1 + H <sub>2</sub> O | Unc. (%) | P2 + H <sub>2</sub> O | Unc. (%) | P3 + H <sub>2</sub> O | Unc. (%) |
| 299           | 4.88E-13 | 4.10E-03 | 1.24E-14 | 1.60E-01 | 1.01E-11 | 2.00E-04 | 8.01E-17              | 2.50E+01 | 1.40E-16              | 1.40E+01 | 2.00E-17              | 1.00E+02 |
| 324           | 4.46E-13 | 4.50E-03 | 1.42E-14 | 1.40E-01 | 8.80E-12 | 2.30E-04 | 8.00E-17              | 2.50E+01 | 3.00E-16              | 6.70E+00 | 2.00E-17              | 1.00E+02 |
| 348           | 4.18E-13 | 4.80E-03 | 1.54E-14 | 1.30E-01 | 7.77E-12 | 2.60E-04 | 3.00E-16              | 6.70E+00 | 5.20E-16              | 3.80E+00 | 2.00E-17              | 1.00E+02 |
| 373           | 3.93E-13 | 5.10E-03 | 1.71E-14 | 1.20E-01 | 6.81E-12 | 2.90E-04 | 4.60E-16              | 4.30E+00 | 9.40E-16              | 2.10E+00 | 1.00E-16              | 2.00E+01 |
| 398           | 3.73E-13 | 5.40E-03 | 1.95E-14 | 1.00E-01 | 6.02E-12 | 3.30E-04 | 6.80E-16              | 2.90E+00 | 1.38E-15              | 1.40E+00 | 6.00E-17              | 3.30E+01 |
| 423           | 3.46E-13 | 5.80E-03 | 2.21E-14 | 9.00E-02 | 5.33E-12 | 3.80E-04 | 1.68E-15              | 1.20E+00 | 1.86E-15              | 1.10E+00 | 2.60E-16              | 7.70E+00 |

|                       |          |          |          |          |          |          |                       |          |                       |          |                       |          |
|-----------------------|----------|----------|----------|----------|----------|----------|-----------------------|----------|-----------------------|----------|-----------------------|----------|
| 449                   | 3.23E-13 | 6.20E-03 | 2.27E-14 | 8.80E-02 | 4.71E-12 | 4.20E-04 | 2.24E-15              | 8.90E-01 | 3.08E-15              | 6.50E-01 | 4.00E-16              | 5.00E+00 |
| 468                   | 3.11E-13 | 6.40E-03 | 2.44E-14 | 8.20E-02 | 4.32E-12 | 4.60E-04 | 3.34E-15              | 6.00E-01 | 3.88E-15              | 5.20E-01 | 5.00E-16              | 4.00E+00 |
| <b>P = 760 Torr</b>   |          |          |          |          |          |          |                       |          |                       |          |                       |          |
| T (K)                 | I1       | Unc. (%) | I2       | Unc. (%) | I3       | Unc. (%) | P1 + H <sub>2</sub> O | Unc. (%) | P2 + H <sub>2</sub> O | Unc. (%) | P3 + H <sub>2</sub> O | Unc. (%) |
| 299                   | 4.82E-13 | 4.10E-03 | 1.22E-14 | 1.60E-01 | 1.01E-11 | 2.00E-04 | 1.00E-16              | 2.00E+01 | 8.00E-17              | 2.50E+01 | 2.00E-17              | 1.00E+02 |
| 324                   | 4.46E-13 | 4.50E-03 | 1.32E-14 | 1.50E-01 | 8.81E-12 | 2.30E-04 | 1.40E-16              | 1.40E+01 | 1.80E-16              | 1.10E+01 | 2.00E-17              | 1.00E+02 |
| 348                   | 4.22E-13 | 4.70E-03 | 1.60E-14 | 1.20E-01 | 7.76E-12 | 2.60E-04 | 3.60E-16              | 5.60E+00 | 5.60E-16              | 3.60E+00 | 8.00E-17              | 2.50E+01 |
| 373                   | 3.98E-13 | 5.00E-03 | 1.83E-14 | 1.10E-01 | 6.82E-12 | 2.90E-04 | 4.00E-16              | 5.00E+00 | 7.40E-16              | 2.70E+00 | 6.00E-17              | 3.30E+01 |
| 398                   | 3.72E-13 | 5.40E-03 | 1.96E-14 | 1.00E-01 | 6.03E-12 | 3.30E-04 | 9.20E-16              | 2.20E+00 | 1.58E-15              | 1.30E+00 | 1.60E-16              | 1.20E+01 |
| 423                   | 3.44E-13 | 5.80E-03 | 2.14E-14 | 9.40E-02 | 5.32E-12 | 3.80E-04 | 1.22E-15              | 1.60E+00 | 2.20E-15              | 9.10E-01 | 1.20E-16              | 1.70E+01 |
| 449                   | 3.30E-13 | 6.10E-03 | 2.29E-14 | 8.70E-02 | 4.73E-12 | 4.20E-04 | 2.18E-15              | 9.20E-01 | 3.66E-15              | 5.50E-01 | 2.00E-16              | 1.00E+01 |
| 468                   | 3.08E-13 | 6.50E-03 | 2.49E-14 | 8.00E-02 | 4.31E-12 | 4.60E-04 | 3.54E-15              | 5.60E-01 | 4.44E-15              | 4.50E-01 | 5.40E-16              | 3.70E+00 |
| <b>P = 7600 Torr</b>  |          |          |          |          |          |          |                       |          |                       |          |                       |          |
| T (K)                 | I1       | Unc. (%) | I2       | Unc. (%) | I3       | Unc. (%) | P1 + H <sub>2</sub> O | Unc. (%) | P2 + H <sub>2</sub> O | Unc. (%) | P3 + H <sub>2</sub> O | Unc. (%) |
| 299                   | 5.05E-13 | 4.00E-03 | 1.34E-14 | 1.50E-01 | 1.25E-11 | 1.60E-04 | 4.00E-17              | 5.00E+01 | 1.40E-16              | 1.40E+01 | 2.00E-17              | 1.00E+02 |
| 324                   | 4.71E-13 | 4.20E-03 | 1.60E-14 | 1.20E-01 | 1.07E-11 | 1.90E-04 | 1.60E-16              | 1.20E+01 | 2.00E-16              | 1.00E+01 | 2.00E-17              | 1.00E+02 |
| 348                   | 4.44E-13 | 4.50E-03 | 1.81E-14 | 1.10E-01 | 9.21E-12 | 2.20E-04 | 3.00E-16              | 6.70E+00 | 5.80E-16              | 3.40E+00 | 2.00E-17              | 1.00E+02 |
| 373                   | 4.22E-13 | 4.70E-03 | 2.05E-14 | 9.80E-02 | 7.92E-12 | 2.50E-04 | 3.80E-16              | 5.30E+00 | 8.80E-16              | 2.30E+00 | 4.00E-17              | 5.00E+01 |
| 398                   | 3.94E-13 | 5.10E-03 | 2.27E-14 | 8.80E-02 | 6.84E-12 | 2.90E-04 | 8.60E-16              | 2.30E+00 | 1.22E-15              | 1.60E+00 | 8.00E-17              | 2.50E+01 |
| 423                   | 3.66E-13 | 5.50E-03 | 2.23E-14 | 9.00E-02 | 5.92E-12 | 3.40E-04 | 1.22E-15              | 1.60E+00 | 1.80E-15              | 1.10E+00 | 1.80E-16              | 1.10E+01 |
| 449                   | 3.39E-13 | 5.90E-03 | 2.54E-14 | 7.90E-02 | 5.19E-12 | 3.90E-04 | 2.14E-15              | 9.30E-01 | 3.22E-15              | 6.20E-01 | 2.20E-16              | 9.10E+00 |
| 468                   | 3.30E-13 | 6.10E-03 | 2.66E-14 | 7.50E-02 | 4.72E-12 | 4.20E-04 | 3.00E-15              | 6.70E-01 | 4.06E-15              | 4.90E-01 | 3.40E-16              | 5.90E+00 |
| <b>P = 76000 Torr</b> |          |          |          |          |          |          |                       |          |                       |          |                       |          |
| T (K)                 | I1       | Unc. (%) | I2       | Unc. (%) | I3       | Unc. (%) | P1 + H <sub>2</sub> O | Unc. (%) | P2 + H <sub>2</sub> O | Unc. (%) | P3 + H <sub>2</sub> O | Unc. (%) |
| 299                   | 5.24E-13 | 3.80E-03 | 1.85E-14 | 1.10E-01 | 1.28E-11 | 1.60E-04 | 8.00E-17              | 2.50E+01 | 1.60E-16              | 1.20E+01 | 2.00E-17              | 1.00E+02 |
| 324                   | 5.21E-13 | 3.80E-03 | 2.22E-14 | 9.00E-02 | 1.16E-11 | 1.70E-04 | 1.40E-16              | 1.40E+01 | 3.40E-16              | 5.90E+00 | 2.00E-17              | 1.00E+02 |
| 348                   | 5.07E-13 | 3.90E-03 | 2.84E-14 | 7.10E-02 | 1.03E-11 | 1.90E-04 | 2.40E-16              | 8.30E+00 | 3.20E-16              | 6.20E+00 | 6.00E-17              | 3.30E+01 |
| 373                   | 4.89E-13 | 4.10E-03 | 2.99E-14 | 6.70E-02 | 8.98E-12 | 2.20E-04 | 4.80E-16              | 4.20E+00 | 6.40E-16              | 3.10E+00 | 2.00E-17              | 1.00E+02 |
| 398                   | 4.68E-13 | 4.30E-03 | 3.37E-14 | 5.90E-02 | 7.81E-12 | 2.60E-04 | 7.80E-16              | 2.60E+00 | 1.08E-15              | 1.90E+00 | 1.00E-16              | 2.00E+01 |
| 423                   | 4.49E-13 | 4.50E-03 | 3.70E-14 | 5.40E-02 | 6.88E-12 | 2.90E-04 | 1.38E-15              | 1.40E+00 | 1.68E-15              | 1.20E+00 | 8.00E-17              | 2.50E+01 |
| 449                   | 4.24E-13 | 4.70E-03 | 4.02E-14 | 5.00E-02 | 6.09E-12 | 3.30E-04 | 2.46E-15              | 8.10E-01 | 3.54E-15              | 5.60E-01 | 3.60E-16              | 5.60E+00 |
| 468                   | 4.08E-13 | 4.90E-03 | 4.15E-14 | 4.80E-02 | 5.55E-12 | 3.60E-04 | 3.28E-15              | 6.10E-01 | 3.90E-15              | 5.10E-01 | 4.80E-16              | 4.20E+00 |

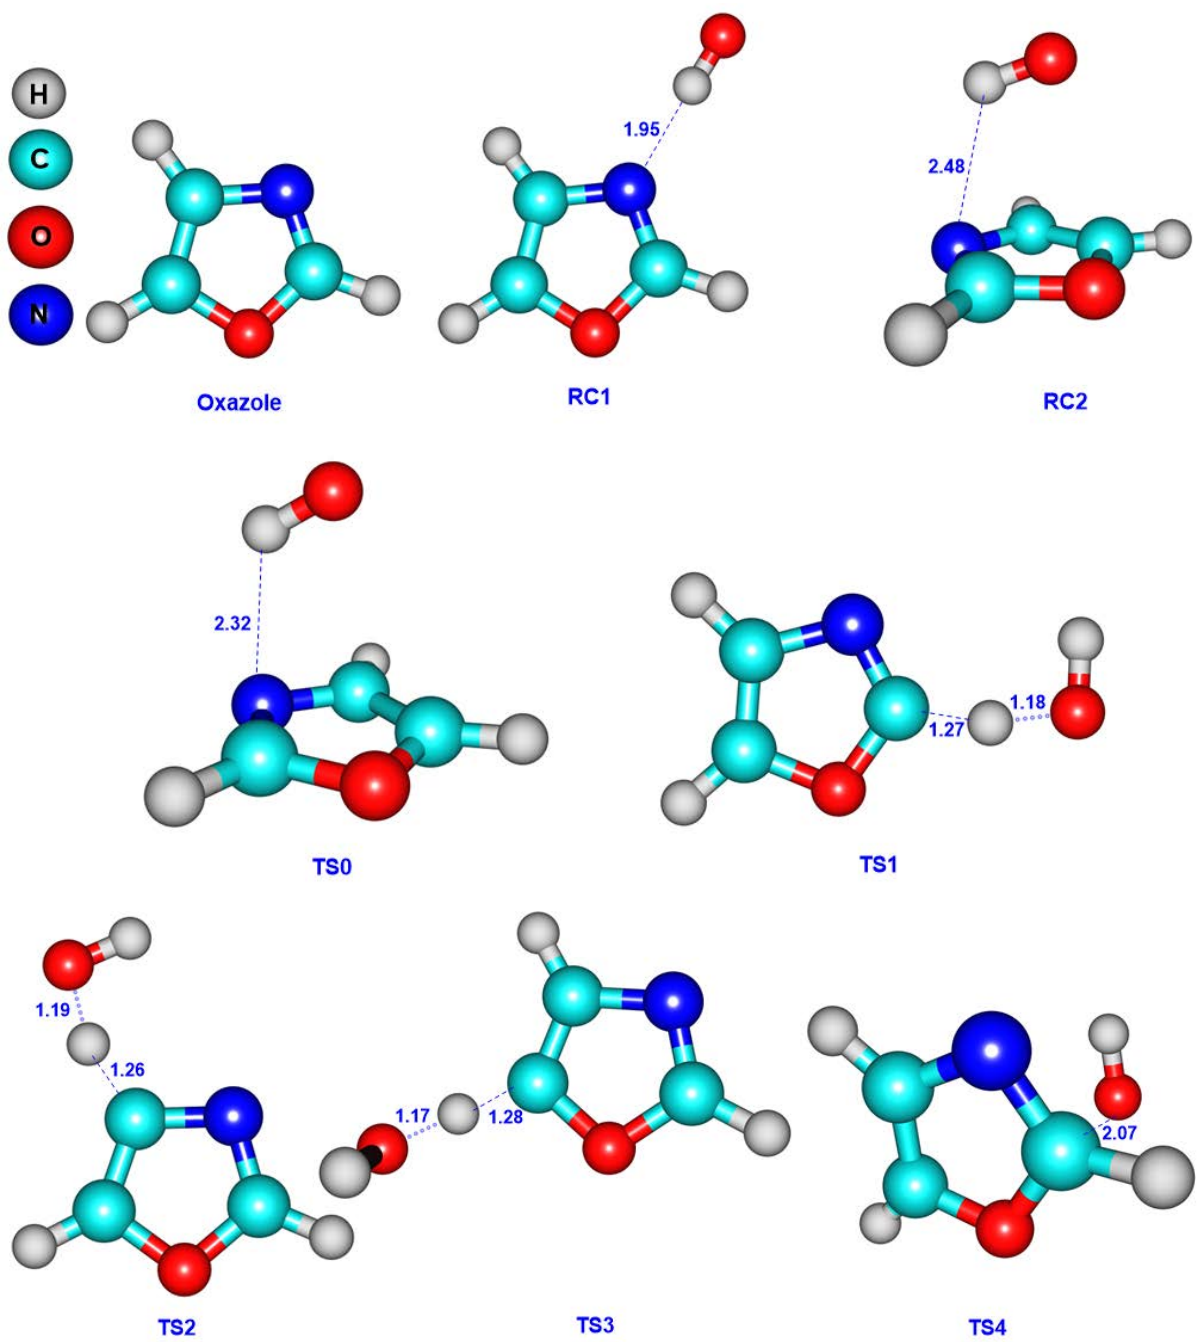

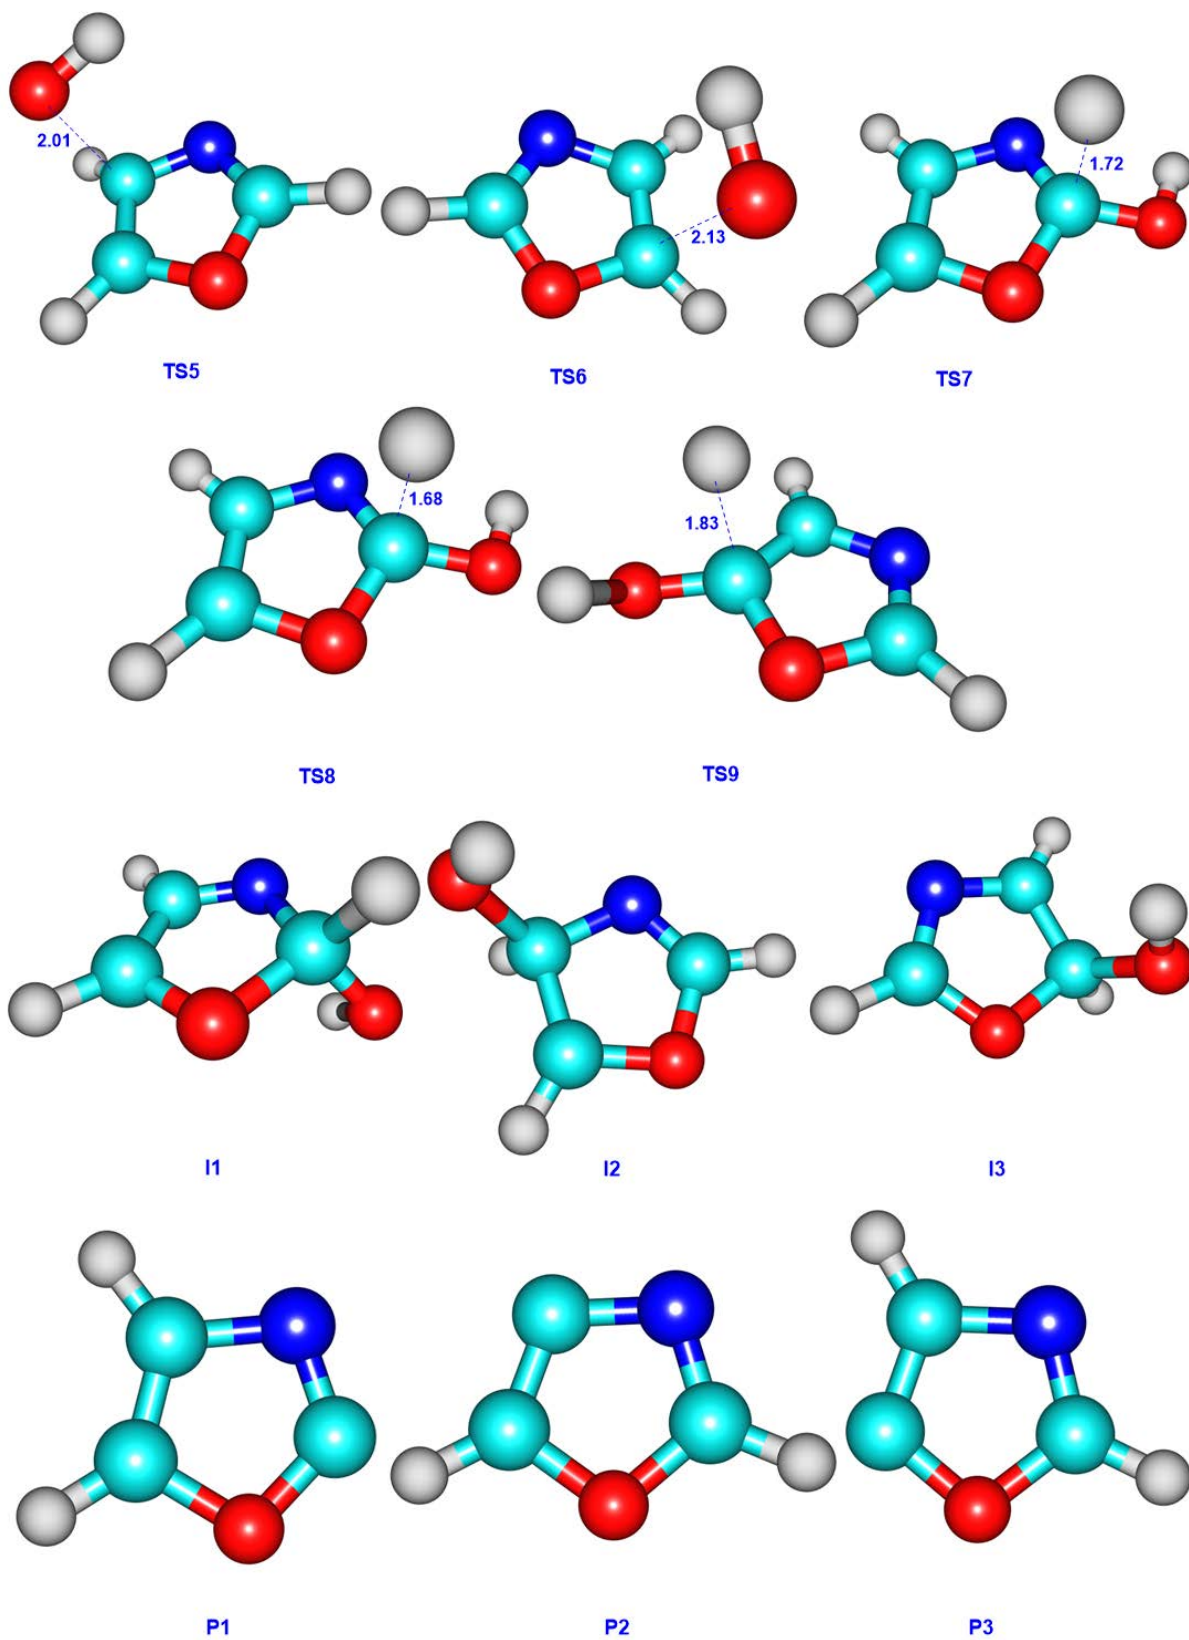



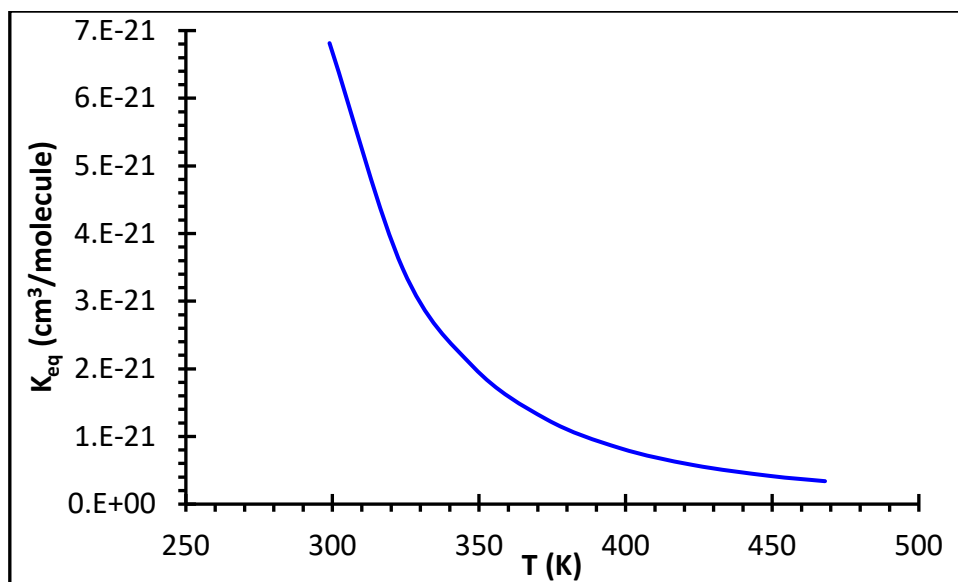

**Figure S3:** Plot of  $K_{eq}$  for the reaction of oxazole + OH  $\rightarrow$  RC1 ( $K_{eq} = [RC1]_{eq}/([OH]_{eq} \times [oxazole]_{eq})$ ) as a function of temperature ( $T = 299 - 468$  K).

## Species

## Potential energy surfaces for the internal rotations

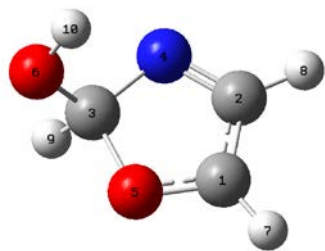

I1

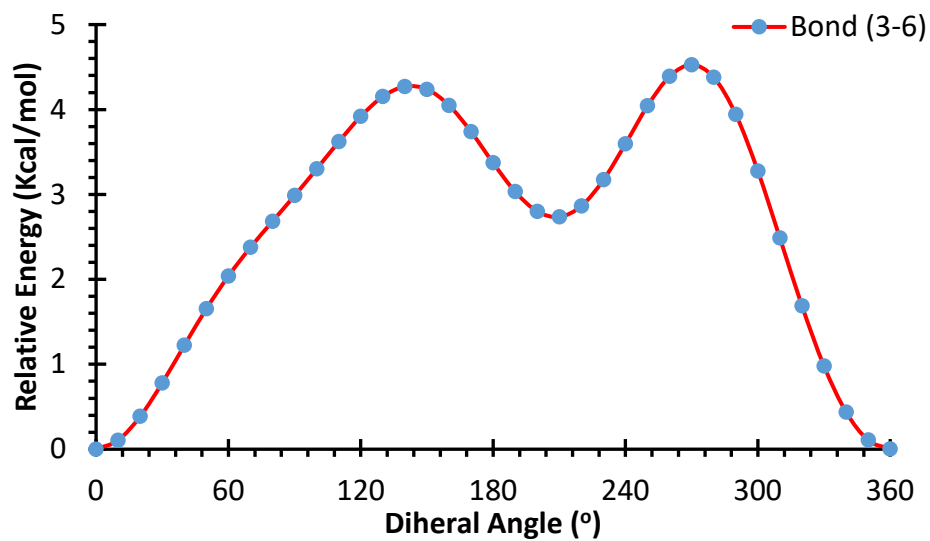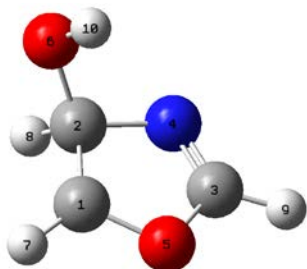

I2

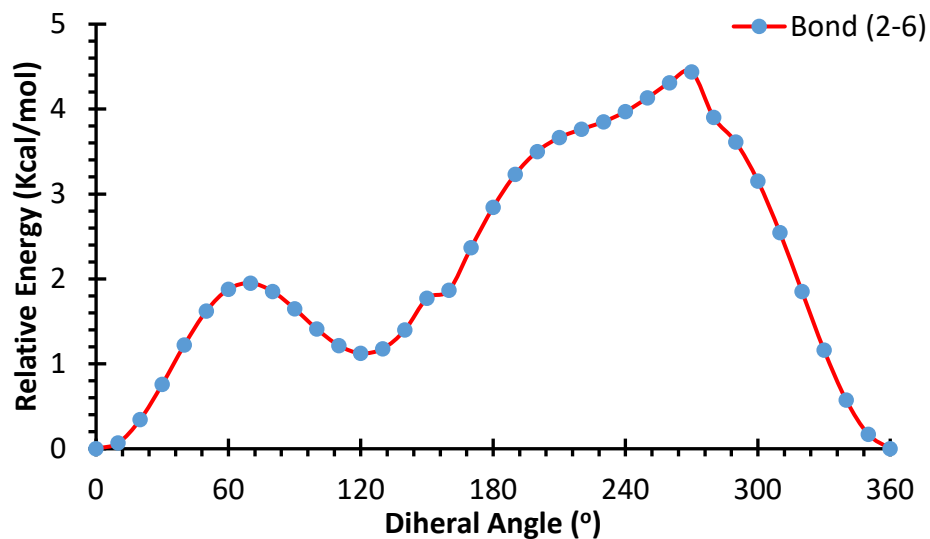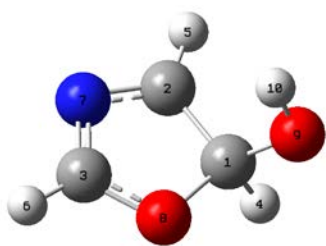

I3

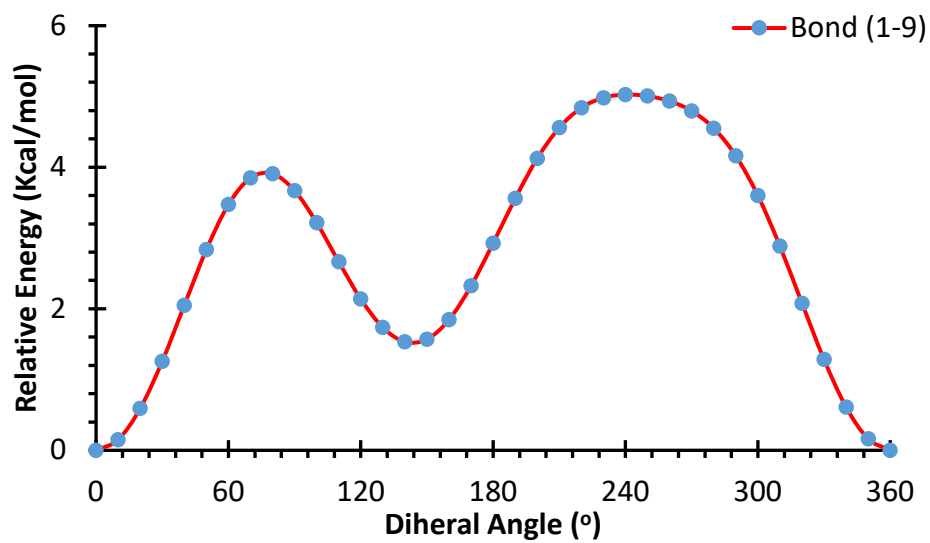



## Species

## Potential energy surfaces for the internal rotations

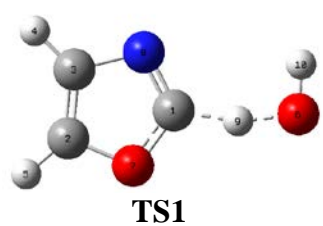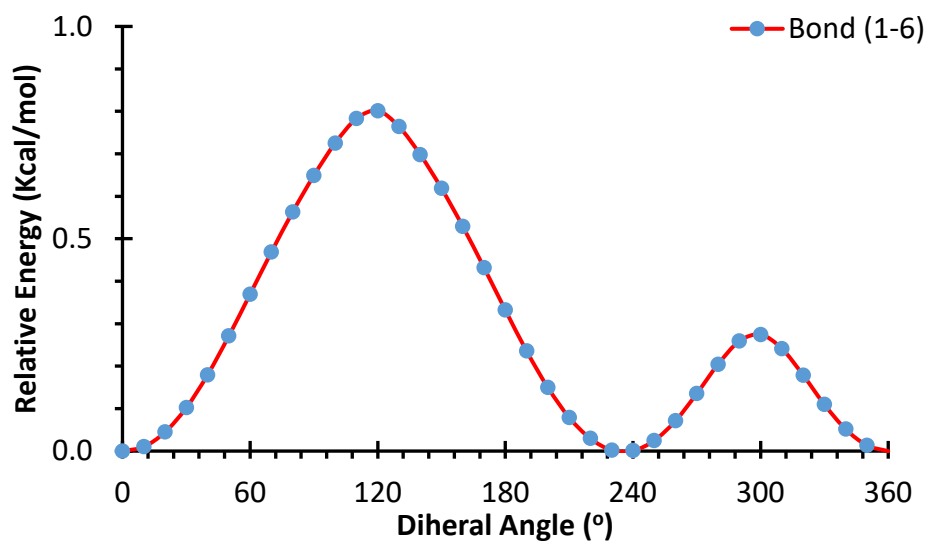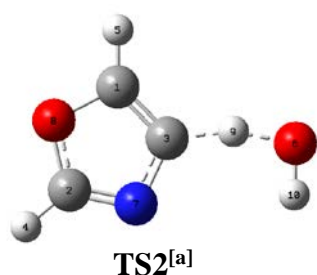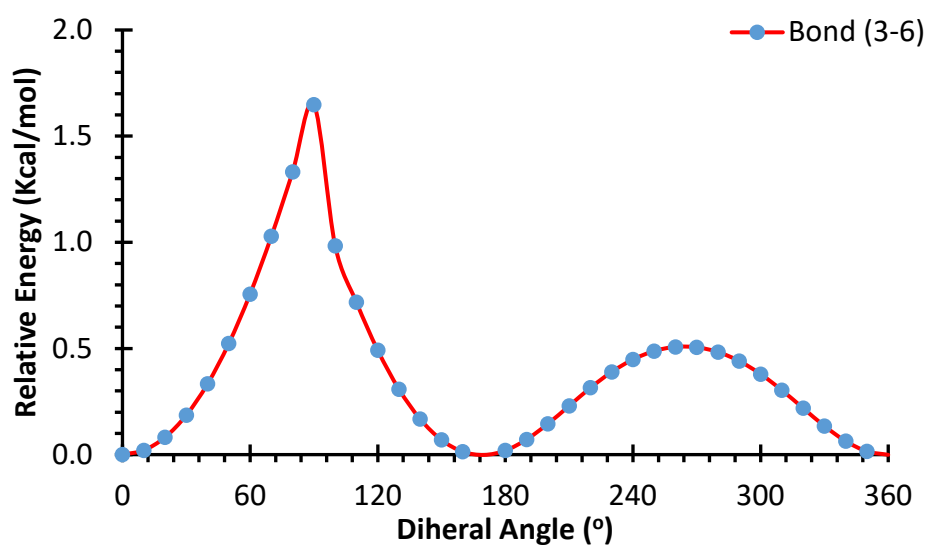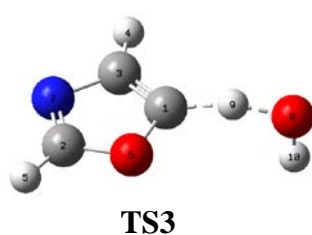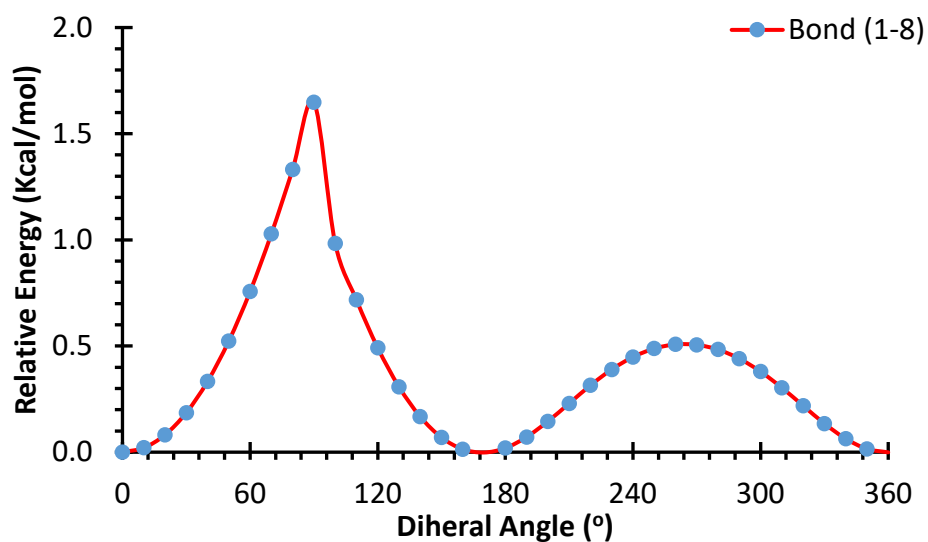

## Species

## Potential energy surfaces for the internal rotations

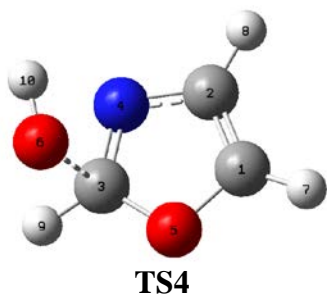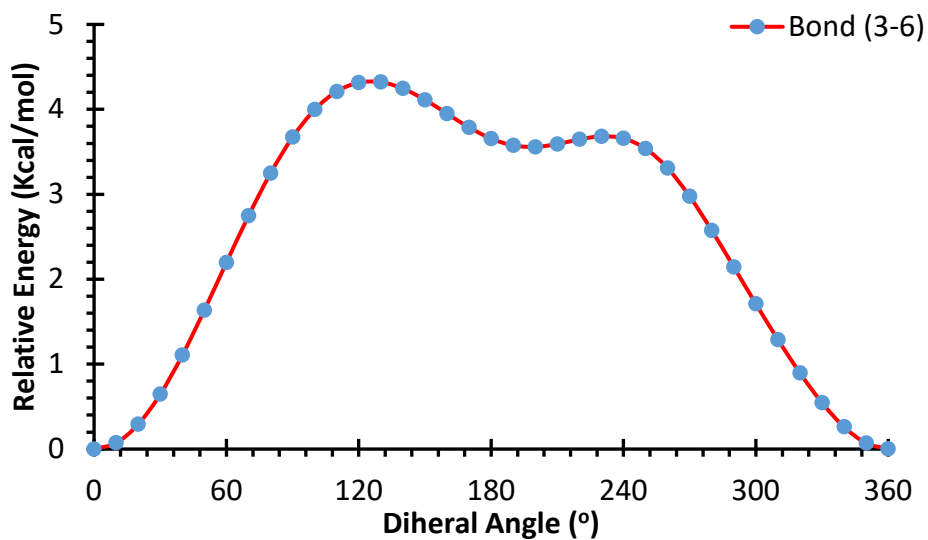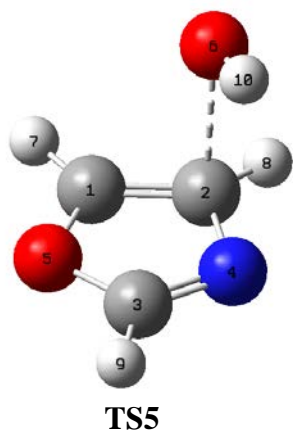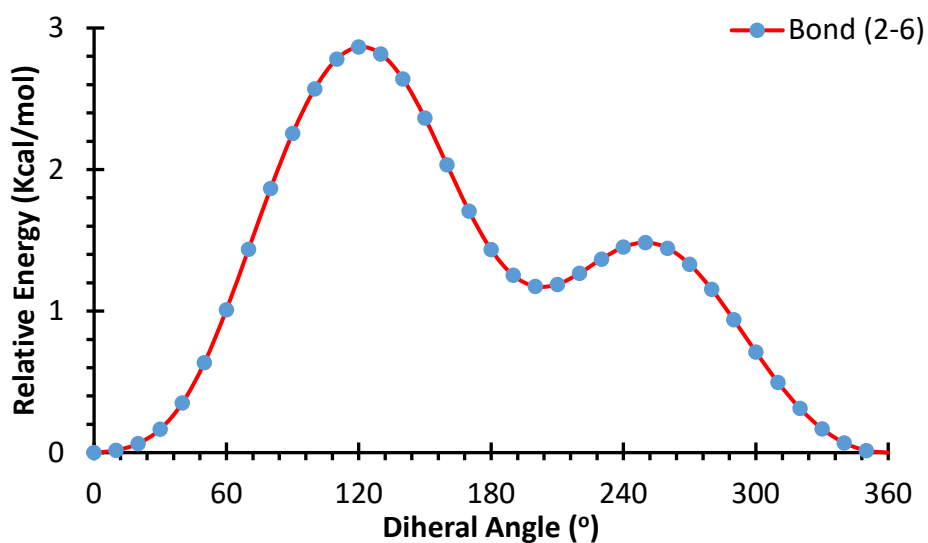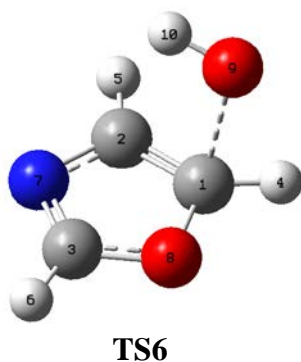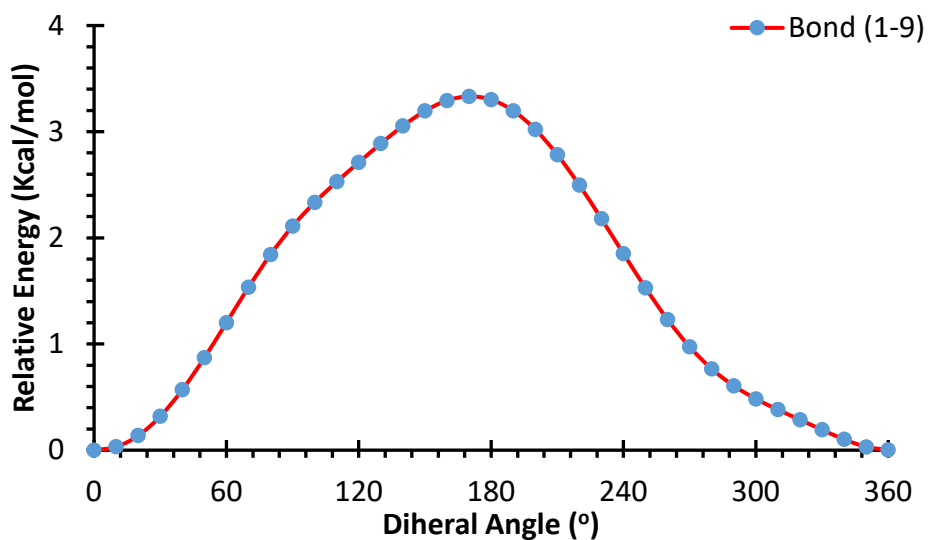

## Species

## Potential energy surfaces for the internal rotations

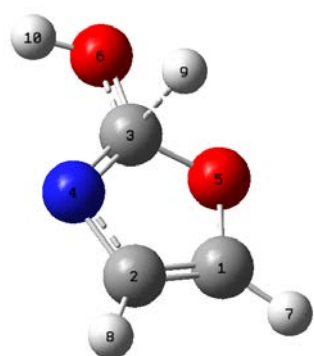

TS7

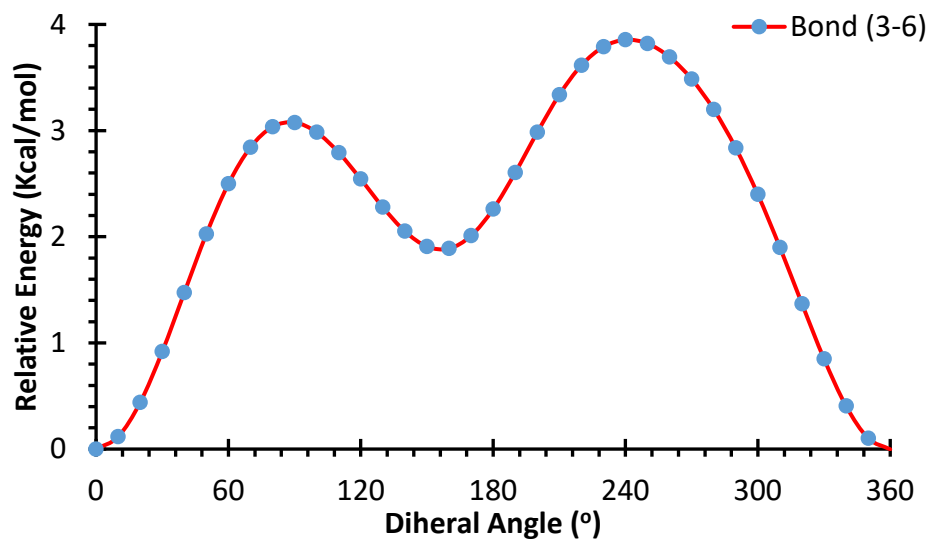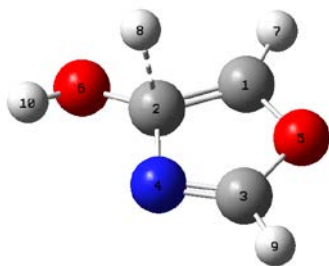

TS8

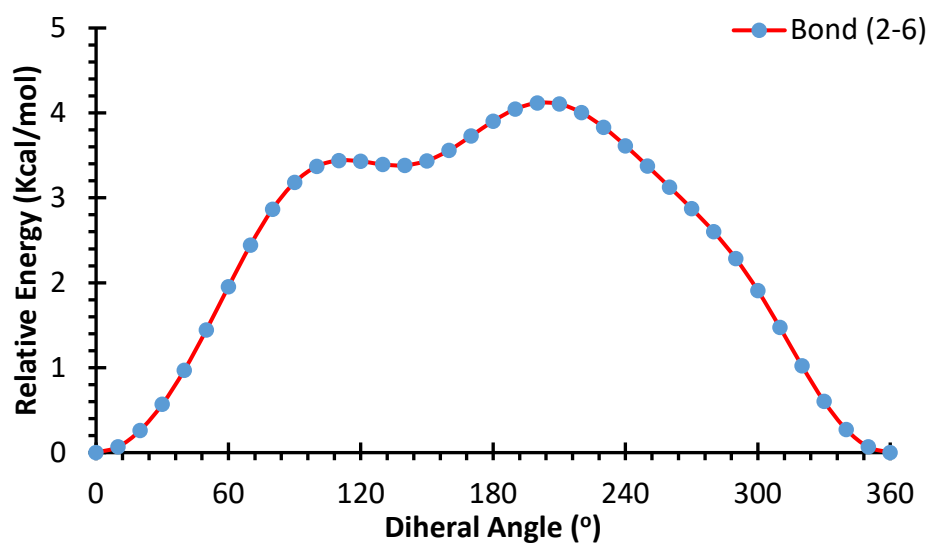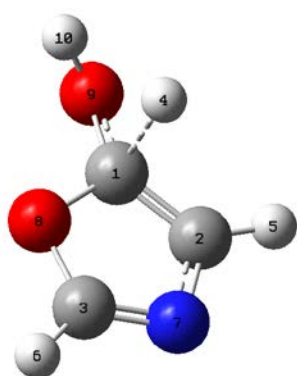

TS9

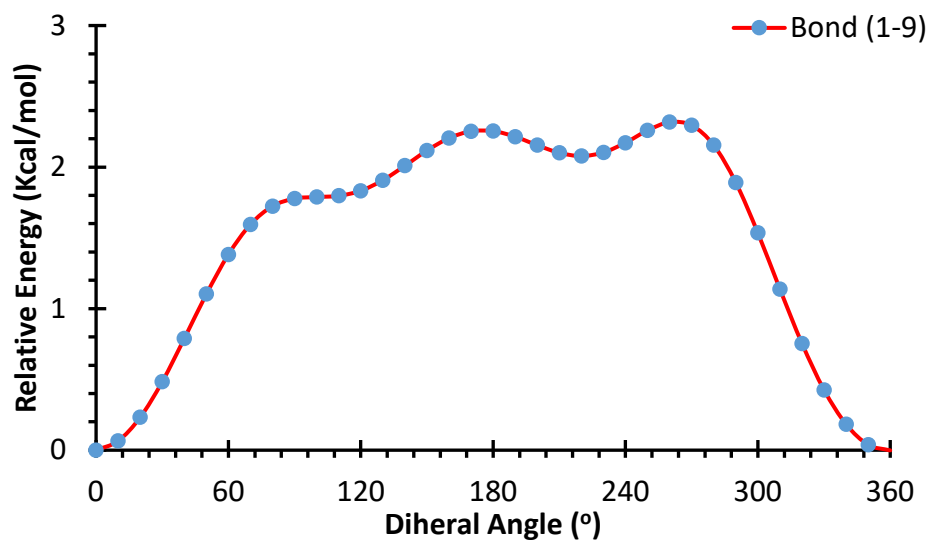

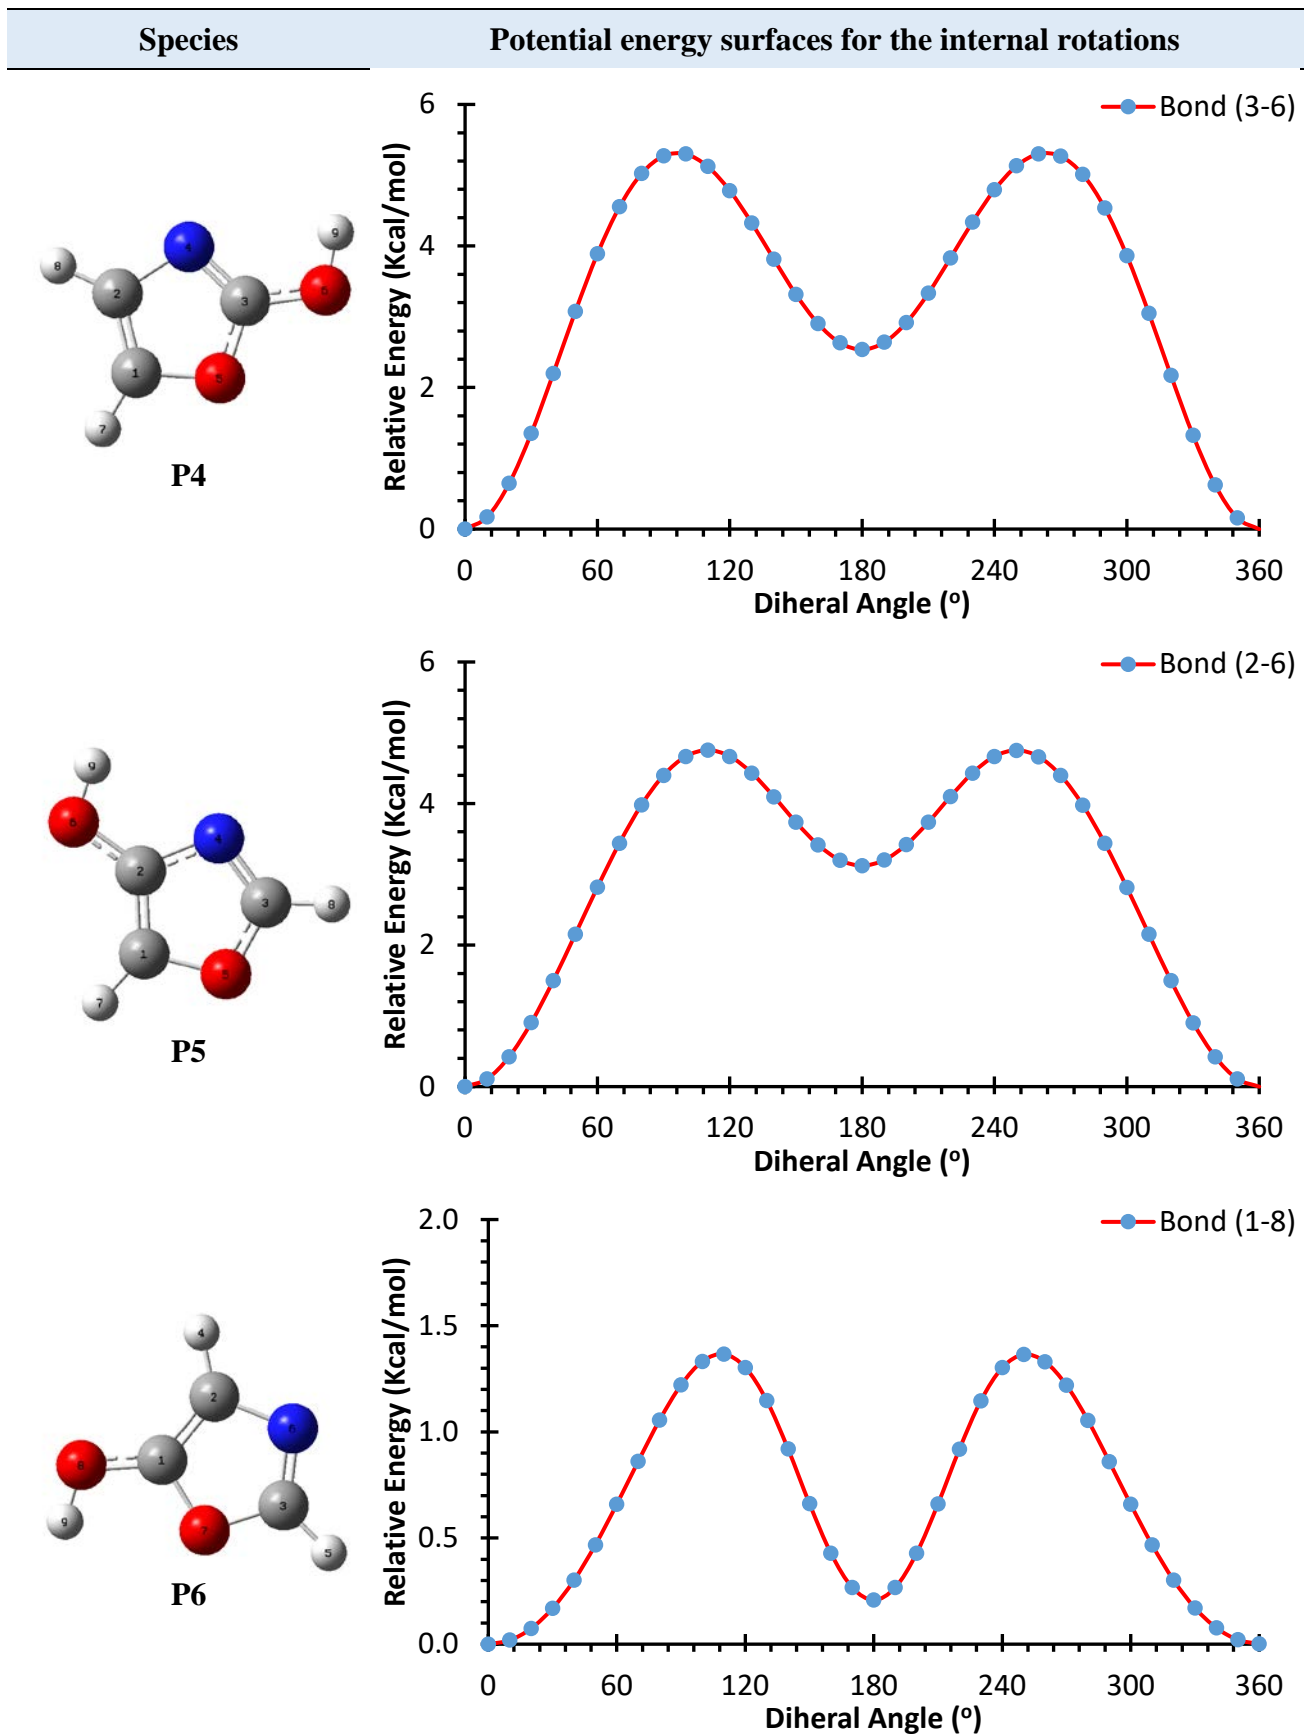

**Figure S4:** Hindrance potentials for the species involved in the oxazole + OH reaction, calculated at M06-2X/cc-pVDZ level of theory. (<sup>[a]</sup> assumed as **TS3**).

## References:

1. K. P. Huber and G. Herzberg, *Molecular Spectra and Molecular Structure. IV. Constants of Diatomic Molecules*, Van Nostrand Reinhold Co, 1979.
2. T. Shimanouchi, *Tables of Molecular Vibrational Frequencies, Consolidated Volume I, NSRDS NBS-39*.
3. A. Shiroudi, M. Abdel-Rahman, A. El-Nahas and M. Altarawneh, *New J. Chem.*, **2021**, 45, 2237-2248.
